# Supplementary material for: Organic–inorganic hybrid self-pigmenting effect of anodic aluminium oxide membranes
Source: Royal Society of Chemistry journal article supplement (doi:10.1039/d2tc03304f), 2022-01-01
Supplement: d2tc03304f1.pdf [file d2tc03304f1.pdf]

## Electronic Supplementary Information

### **Organic-inorganic hybrid self-pigmenting effect of anodic aluminium oxide membranes**

Junxi Zhang,<sup>\*a</sup> Wei Zhang,<sup>a,b</sup> Wei Xu,<sup>c</sup> Kang Xie,<sup>d</sup> Qingsong shan,<sup>e</sup> Guangtao Fei,<sup>c</sup> Junhui Jia,<sup>c</sup> Xiaoguang Zhu,<sup>c</sup> Lide Zhang,<sup>c</sup> Zhiyong Fan<sup>f</sup> and Haibo Zeng<sup>\*e</sup>

<sup>a</sup> School of Instrument Science and Opto-electronics Engineering, Anhui Province Key Laboratory of Measuring Theory and Precision Instrument, Anhui Key Laboratory of Advanced Functional Materials and Devices, National Engineering Laboratory of Special Display Technology, Hefei University of Technology, Hefei 230009, China

<sup>b</sup> School of Physics, Hefei University of Technology, Hefei 230009, China

<sup>c</sup> Key Laboratory of Materials Physics and Anhui Key Laboratory of Nanomaterials and Nanostructures, Institute of Solid State Physics, Chinese Academy of Sciences, Hefei 230031, P. R. China

<sup>d</sup> School of Opto-Electronic Engineering, Zaozhuang University, Zaozhuang 277160, Shandong, China

<sup>e</sup> MIIT Key Laboratory of Advanced Display Materials and Devices, Institute of Optoelectronics & Nanomaterials, School of Materials Science and Engineering, Nanjing University of Science and Technology, Nanjing 210094, China

<sup>f</sup> Department of Electronic & Computer Engineering, The Hong Kong University of Science and Technology, Clear Water Bay, Kowloon, Hong Kong SAR, China

\*To whom correspondence should be addressed. Email: junxi.zhang@hfut.edu.cn, zeng.haibo@njust.edu.cn

1. Measurements of sizes of the top and bottom nanochannels of the AAO membranes by a Gatan DigitalMicrograph (DM) software

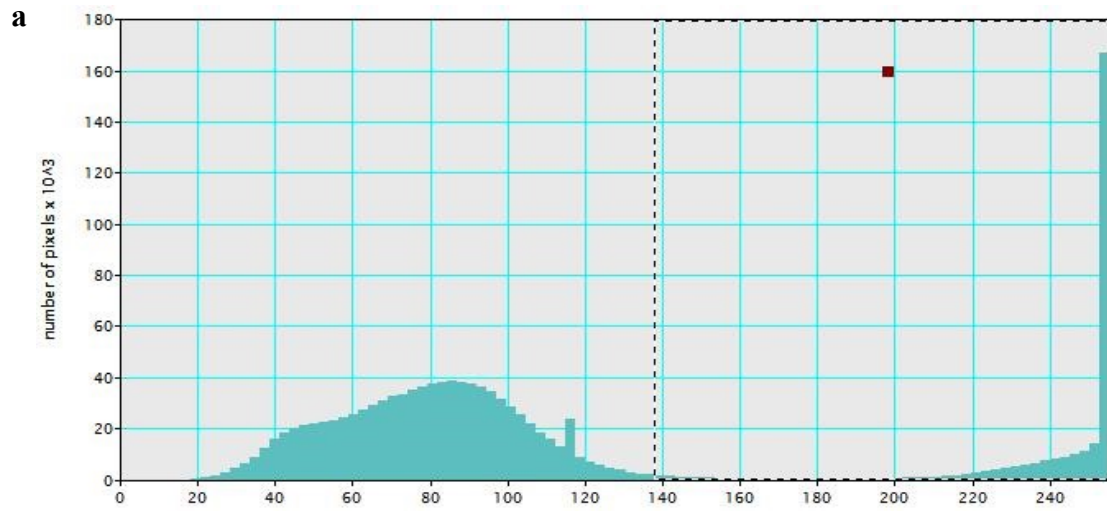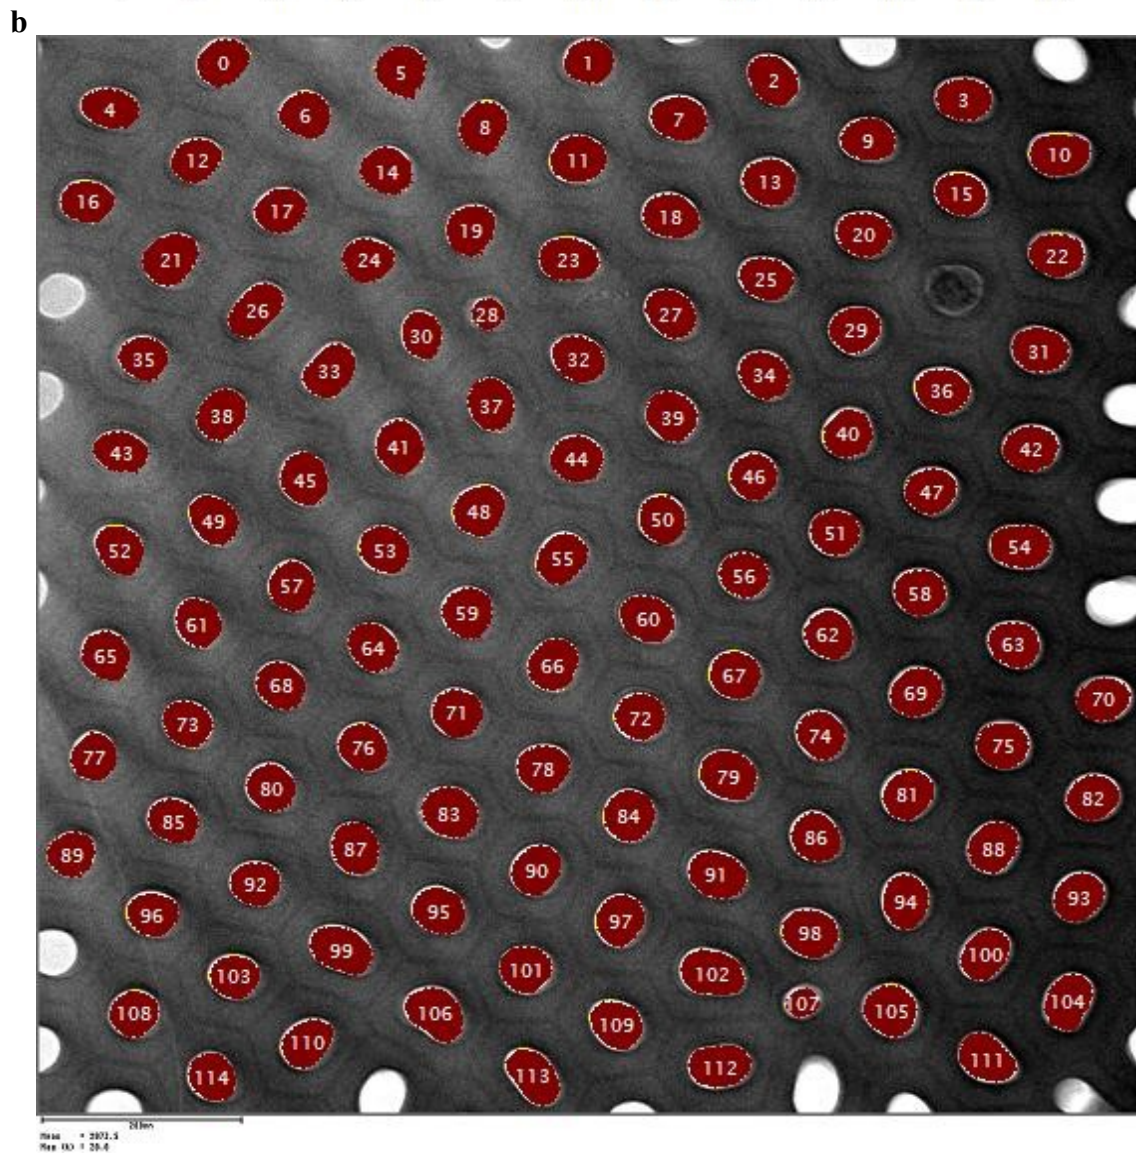

|     | <i>FilledArea</i> | <i>CircleDiameter</i> |
|-----|-------------------|-----------------------|
| R0  | 2128.0            | 53.2284               |
| R1  | 1937.0            | 50.1124               |
| R2  | 2155.0            | 52.7879               |
| R3  | 2048.0            | 51.4354               |
| R4  | 2033.0            | 52.2904               |
| R5  | 2356.0            | 58.6699               |
| R6  | 2064.0            | 52.1644               |
| R7  | 2226.0            | 53.7078               |
| R8  | 2219.0            | 54.8496               |
| R9  | 2049.0            | 51.3877               |
| R10 | 2328.0            | 55.5584               |
| R11 | 2324.0            | 54.6029               |
| R12 | 1886.0            | 49.282                |
| R13 | 2221.0            | 53.0534               |
| R14 | 2181.0            | 54.7716               |
| R15 | 1925.0            | 49.5724               |
| R16 | 1965.0            | 50.8472               |
| R17 | 1994.0            | 51.0859               |
| R18 | 2207.0            | 53.4114               |
| R19 | 2141.0            | 53.0623               |
| R20 | 2106.0            | 51.9483               |
| R21 | 2429.0            | 56.1346               |
| R22 | 2115.0            | 52.3849               |
| R23 | 2307.0            | 55.5219               |
| R24 | 1942.0            | 50.3019               |
| R25 | 2023.0            | 51.1779               |
| R26 | 2256.0            | 55.8574               |
| R27 | 2116.0            | 52.088                |
| R28 | 960.0             | 35.5284               |
| R29 | 2046.0            | 51.0324               |
| R30 | 1682.0            | 47.3331               |
| R31 | 2189.0            | 53.1052               |
| R32 | 2114.0            | 52.233                |
| R33 | 2319.0            | 55.5415               |
| R34 | 2076.0            | 51.2596               |
| R35 | 1886.0            | 49.7445               |
| R36 | 2117.0            | 52.013                |
| R37 | 2130.0            | 52.714                |
| R38 | 2147.0            | 52.6976               |

|     | <i>FilledArea</i> | <i>CircleDiameter</i> |
|-----|-------------------|-----------------------|
| R39 | 2246.0            | 53.4261               |
| R40 | 2079.0            | 51.3833               |
| R41 | 2293.0            | 54.7958               |
| R42 | 2159.0            | 52.4611               |
| R43 | 1998.0            | 52.3483               |
| R44 | 2131.0            | 52.2543               |
| R45 | 2221.0            | 54.2005               |
| R46 | 1917.0            | 49.0661               |
| R47 | 2056.0            | 51.0233               |
| R48 | 2288.0            | 54.2834               |
| R49 | 2069.0            | 52.3906               |
| R50 | 1986.0            | 50.27                 |
| R51 | 1941.0            | 49.5797               |
| R52 | 2031.0            | 51.4663               |
| R53 | 2099.0            | 51.8175               |
| R54 | 2291.0            | 54.8967               |
| R55 | 2215.0            | 53.5671               |
| R56 | 1953.0            | 49.6948               |
| R57 | 1988.0            | 50.4777               |
| R58 | 2029.0            | 50.7138               |
| R59 | 2228.0            | 53.1587               |
| R60 | 2214.0            | 53.5897               |
| R61 | 1973.0            | 50.5407               |
| R62 | 2052.0            | 51.0584               |
| R63 | 2038.0            | 50.9632               |
| R64 | 2063.0            | 51.3497               |
| R65 | 2085.0            | 52.9374               |
| R66 | 2240.0            | 53.8297               |
| R67 | 2130.0            | 51.8331               |
| R68 | 1991.0            | 50.3374               |
| R69 | 2189.0            | 52.5862               |
| R70 | 2011.0            | 50.8106               |
| R71 | 2115.0            | 51.7899               |
| R72 | 2060.0            | 51.0814               |
| R73 | 1994.0            | 50.5272               |
| R74 | 2034.0            | 50.8182               |
| R75 | 2128.0            | 51.9206               |
| R76 | 2019.0            | 50.6704               |
| R77 | 1904.0            | 49.3283               |

|      | <i>FilledArea</i> | <i>CircleDiameter</i> |
|------|-------------------|-----------------------|
| R78  | 2153.0            | 52.391                |
| R79  | 2471.0            | 56.3416               |
| R80  | 2025.0            | 50.8826               |
| R81  | 2194.0            | 52.7527               |
| R82  | 2061.0            | 51.1954               |
| R83  | 2501.0            | 56.7738               |
| R84  | 2303.0            | 54.0352               |
| R85  | 1935.0            | 49.9522               |
| R86  | 2105.0            | 51.5902               |
| R87  | 2133.0            | 52.4239               |
| R88  | 2160.0            | 52.455                |
| R89  | 1877.0            | 49.0091               |
| R90  | 2096.0            | 51.8851               |
| R91  | 2337.0            | 54.9409               |
| R92  | 1914.0            | 49.4964               |
| R93  | 2081.0            | 51.4171               |
| R94  | 2188.0            | 52.893                |
| R95  | 2159.0            | 52.5879               |
| R96  | 1980.0            | 50.1963               |
| R97  | 2168.0            | 52.5651               |
| R98  | 2399.0            | 55.3463               |
| R99  | 2496.0            | 57.7625               |
| R100 | 2088.0            | 52.1093               |
| R101 | 2101.0            | 51.7033               |
| R102 | 2573.0            | 58.6696               |
| R103 | 1895.0            | 49.1171               |
| R104 | 2220.0            | 54.1359               |
| R105 | 2388.0            | 55.1056               |
| R106 | 2573.0            | 58.759                |
| R107 | 906.0             | 34.1982               |
| R108 | 1967.0            | 49.8647               |
| R109 | 2207.0            | 53.3386               |
| R110 | 2095.0            | 52.4452               |
| R111 | 2260.0            | 54.8787               |
| R112 | 2303.0            | 55.4867               |
| R113 | 2334.0            | 56.6876               |
| R114 | 1957.0            | 49.9397               |

**Fig. S1 a1.** (a) Histogram of thresholding the TEM image of the top surface of the AAO membrane without the chemical etching, the thresholding is the process of separating the top surfaces of the nanochannels from the rest of the image, ideally, the histogram contains two major peaks: one for the background, the other for the nanochannels. (b) The TEM image with analyzed nanochannels after the thresholding. (c) Measurements of the sizes (diameter, unit: nm) of the analyzed nanochannels on the top surface.

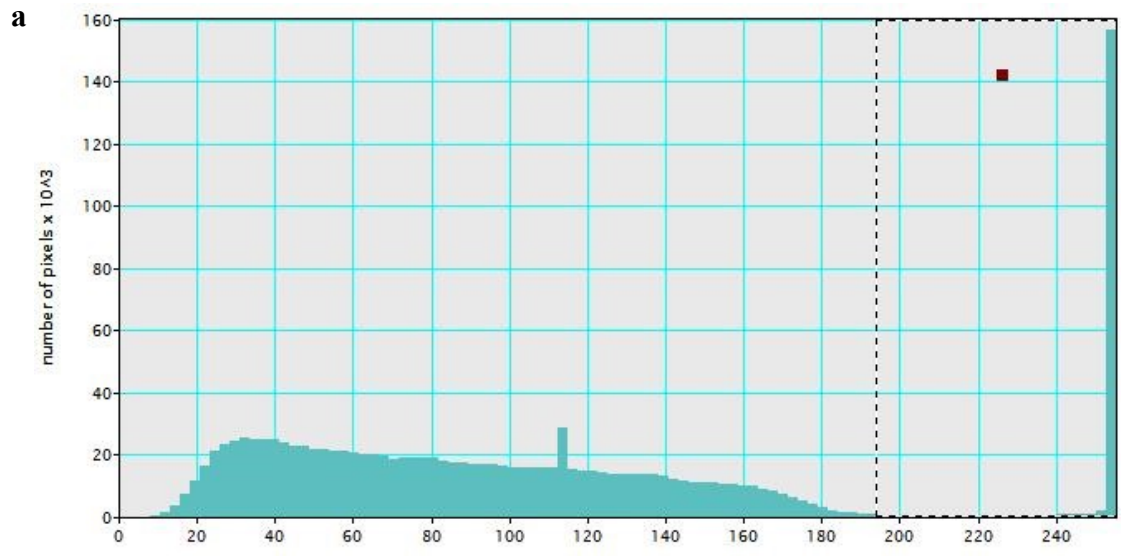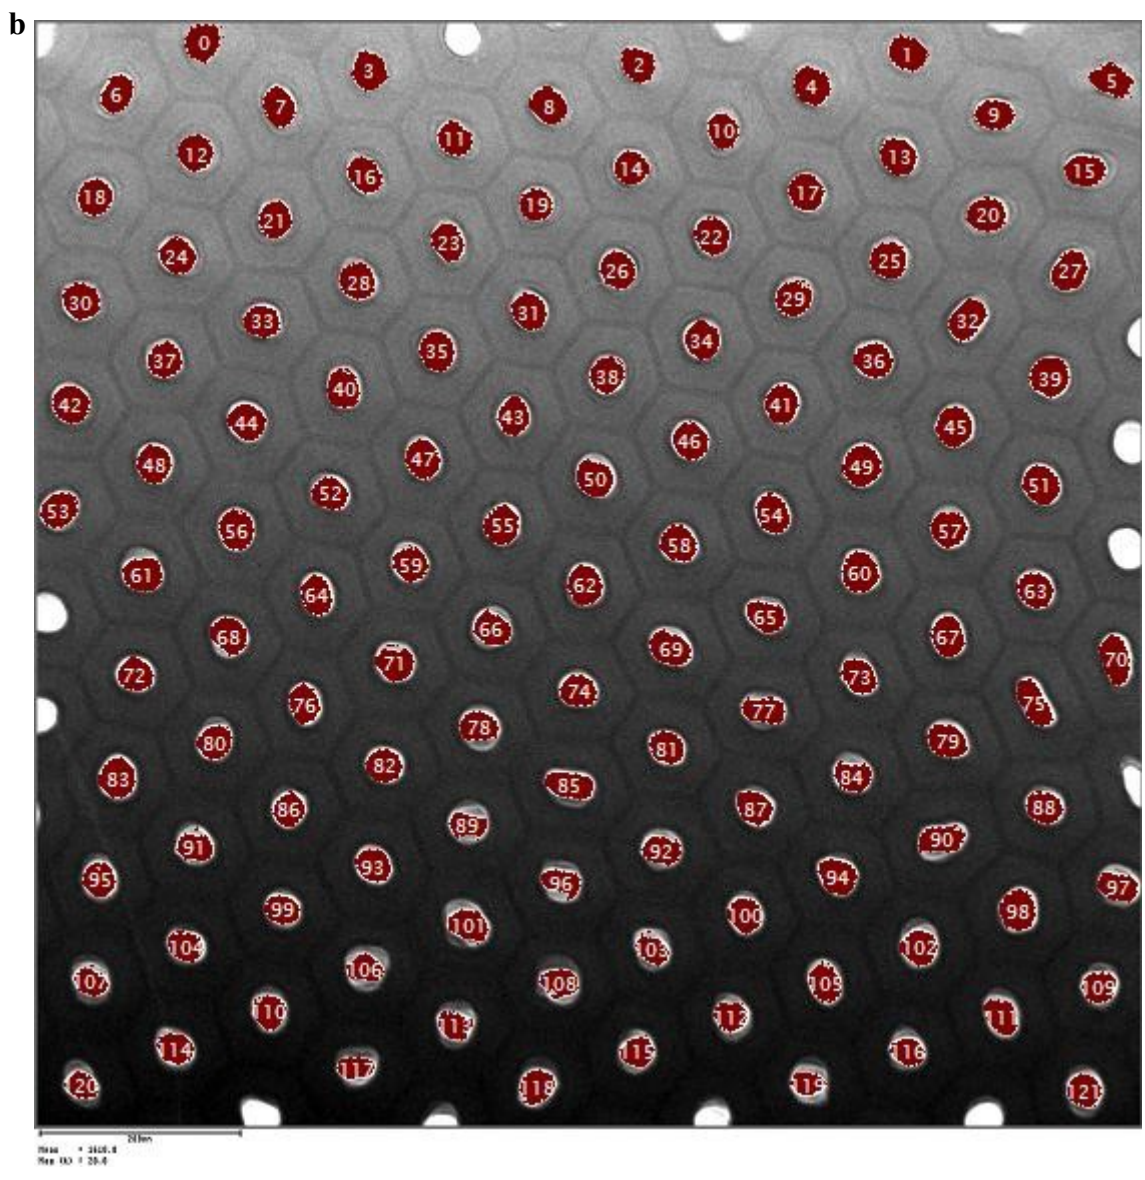

**c**

|            | <i>FilledArea</i> | <i>QrcD anet e</i> |            | <i>FilledArea</i> | <i>QrcD anet e</i> |             | <i>FilledArea</i> | <i>QrcD anet e</i> |
|------------|-------------------|--------------------|------------|-------------------|--------------------|-------------|-------------------|--------------------|
| <i>R0</i>  | 1212.0            | 40.7816            | <i>R41</i> | 1108.0            | 37.511             | <i>R82</i>  | 1050.0            | 36.2174            |
| <i>R1</i>  | 1136.0            | 39.0978            | <i>R42</i> | 1194.0            | 38.7896            | <i>R83</i>  | 1250.0            | 39.8998            |
| <i>R2</i>  | 1050.0            | 37.6815            | <i>R43</i> | 1016.0            | 35.8478            | <i>R84</i>  | 966.0             | 36.1272            |
| <i>R3</i>  | 1165.0            | 39.5144            | <i>R44</i> | 1175.0            | 38.5558            | <i>R85</i>  | 1156.0            | 40.8783            |
| <i>R4</i>  | 1214.0            | 40.0522            | <i>R45</i> | 1248.0            | 39.8211            | <i>R86</i>  | 940.0             | 34.4313            |
| <i>R5</i>  | 1187.0            | 42.2894            | <i>R46</i> | 1156.0            | 38.0765            | <i>R87</i>  | 1044.0            | 36.6519            |
| <i>R6</i>  | 1071.0            | 37.5399            | <i>R47</i> | 1147.0            | 38.2229            | <i>R88</i>  | 1006.0            | 35.8128            |
| <i>R7</i>  | 1094.0            | 38.0045            | <i>R48</i> | 1148.0            | 37.9748            | <i>R89</i>  | 821.0             | 35.0884            |
| <i>R8</i>  | 1130.0            | 38.1085            | <i>R49</i> | 1330.0            | 40.9326            | <i>R90</i>  | 1112.0            | 41.1961            |
| <i>R9</i>  | 1032.0            | 36.6269            | <i>R50</i> | 1224.0            | 39.9818            | <i>R91</i>  | 954.0             | 36.2103            |
| <i>R10</i> | 985.0             | 36.0752            | <i>R51</i> | 1231.0            | 39.4616            | <i>R92</i>  | 965.0             | 36.4195            |
| <i>R11</i> | 1022.0            | 36.3757            | <i>R52</i> | 1004.0            | 35.7097            | <i>R93</i>  | 1024.0            | 36.2218            |
| <i>R12</i> | 1101.0            | 37.3141            | <i>R53</i> | 1115.0            | 37.6572            | <i>R94</i>  | 1143.0            | 38.4667            |
| <i>R13</i> | 1153.0            | 38.2606            | <i>R54</i> | 1127.0            | 37.8719            | <i>R95</i>  | 989.0             | 35.4871            |
| <i>R14</i> | 1001.0            | 35.7282            | <i>R55</i> | 1150.0            | 38.1429            | <i>R96</i>  | 881.0             | 35.7923            |
| <i>R15</i> | 1102.0            | 37.6669            | <i>R56</i> | 1201.0            | 38.9853            | <i>R97</i>  | 1011.0            | 37.5725            |
| <i>R16</i> | 1031.0            | 37.0847            | <i>R57</i> | 1124.0            | 37.7206            | <i>R98</i>  | 1262.0            | 40.2573            |
| <i>R17</i> | 1123.0            | 37.6348            | <i>R58</i> | 1133.0            | 37.8086            | <i>R99</i>  | 869.0             | 33.2996            |
| <i>R18</i> | 1097.0            | 37.2347            | <i>R59</i> | 1048.0            | 36.661             | <i>R100</i> | 1022.0            | 36.0035            |
| <i>R19</i> | 911.0             | 33.795             | <i>R60</i> | 1274.0            | 40.3679            | <i>R101</i> | 1088.0            | 39.2078            |
| <i>R20</i> | 1153.0            | 38.407             | <i>R61</i> | 1156.0            | 38.6927            | <i>R102</i> | 1093.0            | 37.1719            |
| <i>R21</i> | 1039.0            | 36.5035            | <i>R62</i> | 1174.0            | 38.6338            | <i>R103</i> | 853.0             | 34.637             |
| <i>R22</i> | 1119.0            | 37.6464            | <i>R63</i> | 1096.0            | 37.1784            | <i>R104</i> | 939.0             | 34.7722            |
| <i>R23</i> | 1036.0            | 36.6747            | <i>R64</i> | 1070.0            | 37.1062            | <i>R105</i> | 1058.0            | 37.3571            |
| <i>R24</i> | 1125.0            | 37.6184            | <i>R65</i> | 1022.0            | 36.8071            | <i>R106</i> | 818.0             | 34.441             |
| <i>R25</i> | 1162.0            | 38.6152            | <i>R66</i> | 1062.0            | 37.009             | <i>R107</i> | 823.0             | 33.4585            |
| <i>R26</i> | 1141.0            | 38.0711            | <i>R67</i> | 1137.0            | 38.3158            | <i>R108</i> | 925.0             | 35.4906            |
| <i>R27</i> | 1184.0            | 39.1168            | <i>R68</i> | 1109.0            | 37.8245            | <i>R109</i> | 942.0             | 34.8839            |
| <i>R28</i> | 1127.0            | 38.0294            | <i>R69</i> | 1218.0            | 40.1503            | <i>R110</i> | 936.0             | 34.8972            |
| <i>R29</i> | 1122.0            | 37.6734            | <i>R70</i> | 1233.0            | 42.0844            | <i>R111</i> | 989.0             | 36.7248            |
| <i>R30</i> | 1175.0            | 38.5696            | <i>R71</i> | 1192.0            | 38.8727            | <i>R112</i> | 871.0             | 33.6716            |
| <i>R31</i> | 1105.0            | 37.2242            | <i>R72</i> | 1040.0            | 36.2887            | <i>R113</i> | 834.0             | 33.5545            |
| <i>R32</i> | 1234.0            | 40.3507            | <i>R73</i> | 1025.0            | 36.4949            | <i>R114</i> | 963.0             | 35.3774            |
| <i>R33</i> | 994.0             | 35.7273            | <i>R74</i> | 1037.0            | 36.2803            | <i>R115</i> | 870.0             | 33.4513            |
| <i>R34</i> | 1143.0            | 37.9146            | <i>R75</i> | 1179.0            | 42.3216            | <i>R116</i> | 829.0             | 32.4873            |
| <i>R35</i> | 1163.0            | 38.3248            | <i>R76</i> | 1025.0            | 36.381             | <i>R117</i> | 731.0             | 32.3164            |
| <i>R36</i> | 1139.0            | 37.9085            | <i>R77</i> | 981.0             | 37.7903            | <i>R118</i> | 1027.0            | 36.6706            |
| <i>R37</i> | 1052.0            | 36.507             | <i>R78</i> | 1017.0            | 36.792             | <i>R119</i> | 726.0             | 31.7116            |
| <i>R38</i> | 1076.0            | 36.831             | <i>R79</i> | 1130.0            | 38.4               | <i>R120</i> | 739.0             | 30.8731            |
| <i>R39</i> | 1312.0            | 40.6739            | <i>R80</i> | 980.0             | 35.2584            | <i>R121</i> | 994.0             | 35.6867            |
| <i>R40</i> | 1115.0            | 38.002             | <i>R81</i> | 972.0             | 35.1081            |             |                   |                    |

**Fig. S1 a2.** (a) Histogram of thresholding the TEM image of the bottom surface of the AAO membrane without the chemical etching. (b) The TEM image with the analyzed nanochannels after the thresholding. (c) Measurements of the sizes (diameter, unit: nm) of the analyzed nanochannels on the bottom surface of the AAO membrane.

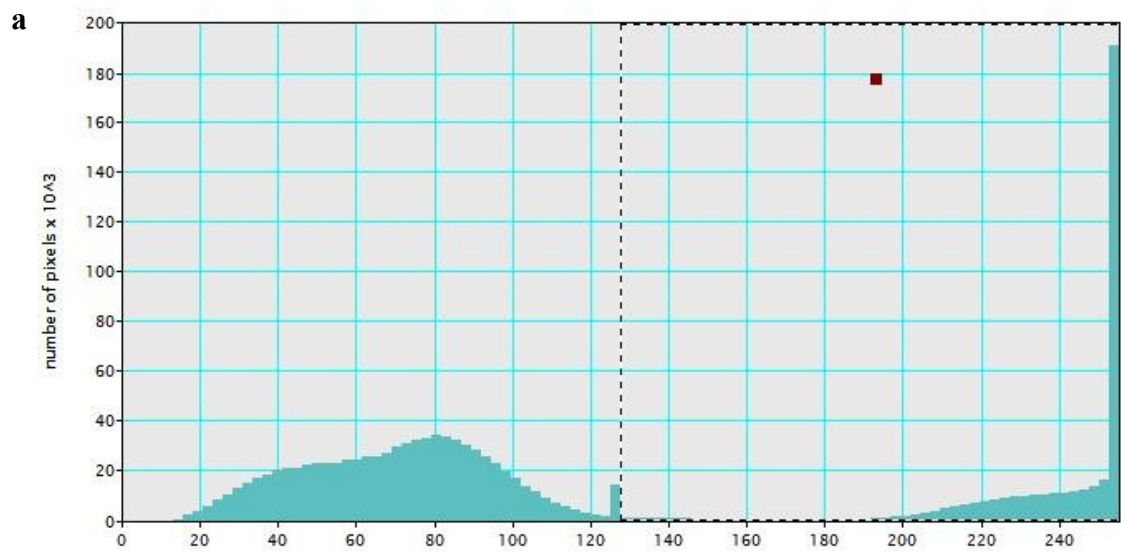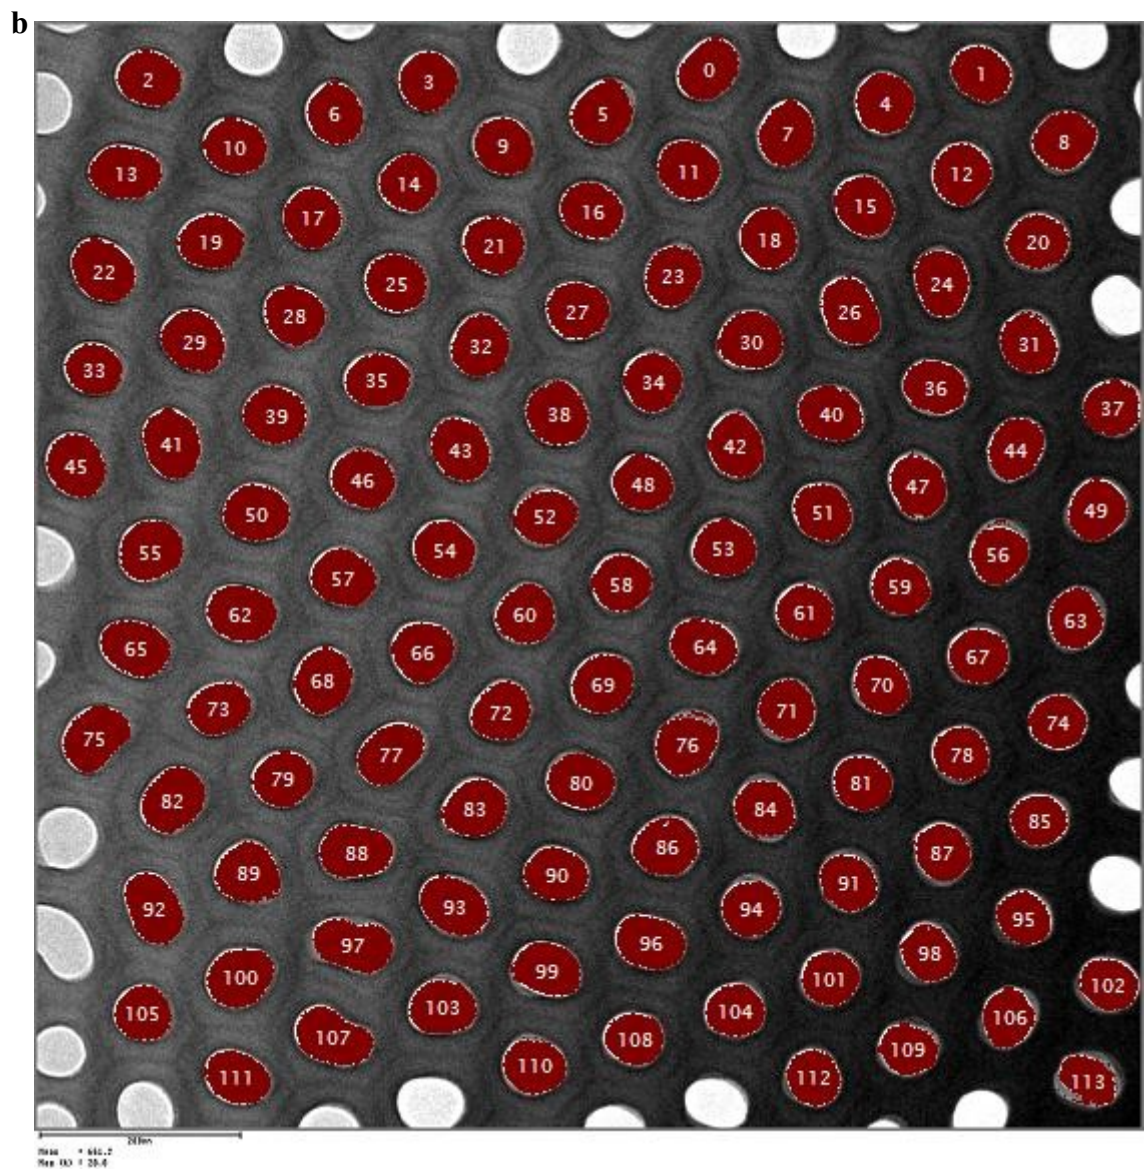

**c**

|            | <i>FilledArea</i> | <i>CircleDiameter</i> |            | <i>FilledArea</i> | <i>CircleDiameter</i> |             | <i>FilledArea</i> | <i>CircleDiameter</i> |
|------------|-------------------|-----------------------|------------|-------------------|-----------------------|-------------|-------------------|-----------------------|
| <i>R0</i>  | 2976.0            | 62.2774               | <i>R38</i> | 3220.0            | 64.2655               | <i>R76</i>  | 3218.0            | 64.5793               |
| <i>R1</i>  | 2707.0            | 59.0188               | <i>R39</i> | 3000.0            | 62.4507               | <i>R77</i>  | 3188.0            | 65.3238               |
| <i>R2</i>  | 2973.0            | 62.4856               | <i>R40</i> | 2924.0            | 61.4205               | <i>R78</i>  | 2483.0            | 56.202                |
| <i>R3</i>  | 2829.0            | 59.9069               | <i>R41</i> | 3273.0            | 65.2237               | <i>R79</i>  | 2782.0            | 59.4414               |
| <i>R4</i>  | 2926.0            | 61.0393               | <i>R42</i> | 2921.0            | 61.4512               | <i>R80</i>  | 3069.0            | 63.2162               |
| <i>R5</i>  | 3181.0            | 64.5274               | <i>R43</i> | 3029.0            | 62.3418               | <i>R81</i>  | 2612.0            | 57.4491               |
| <i>R6</i>  | 2841.0            | 60.3354               | <i>R44</i> | 2797.0            | 60.2125               | <i>R82</i>  | 3305.0            | 65.4487               |
| <i>R7</i>  | 2951.0            | 61.5941               | <i>R45</i> | 3062.0            | 62.6296               | <i>R83</i>  | 3030.0            | 62.4776               |
| <i>R8</i>  | 2949.0            | 61.3917               | <i>R46</i> | 3060.0            | 62.712                | <i>R84</i>  | 2868.0            | 60.9586               |
| <i>R9</i>  | 2801.0            | 59.759                | <i>R47</i> | 2934.0            | 61.635                | <i>R85</i>  | 2401.0            | 55.2348               |
| <i>R10</i> | 2881.0            | 60.5366               | <i>R48</i> | 2772.0            | 59.354                | <i>R86</i>  | 3132.0            | 63.3223               |
| <i>R11</i> | 3015.0            | 61.9733               | <i>R49</i> | 2893.0            | 60.6294               | <i>R87</i>  | 2636.0            | 58.1456               |
| <i>R12</i> | 2958.0            | 61.2484               | <i>R50</i> | 3129.0            | 63.2648               | <i>R88</i>  | 3280.0            | 66.4663               |
| <i>R13</i> | 3193.0            | 64.7387               | <i>R51</i> | 2744.0            | 59.1598               | <i>R89</i>  | 3242.0            | 65.1175               |
| <i>R14</i> | 2707.0            | 58.8062               | <i>R52</i> | 2849.0            | 61.0016               | <i>R90</i>  | 2850.0            | 60.5221               |
| <i>R15</i> | 2928.0            | 61.253                | <i>R53</i> | 2947.0            | 61.3297               | <i>R91</i>  | 2639.0            | 58.3041               |
| <i>R16</i> | 2944.0            | 61.4501               | <i>R54</i> | 2894.0            | 61.0189               | <i>R92</i>  | 3246.0            | 66.0661               |
| <i>R17</i> | 2849.0            | 60.0395               | <i>R55</i> | 3202.0            | 64.1048               | <i>R93</i>  | 3250.0            | 65.5012               |
| <i>R18</i> | 2829.0            | 59.9455               | <i>R56</i> | 2823.0            | 60.9166               | <i>R94</i>  | 2740.0            | 59.4182               |
| <i>R19</i> | 2945.0            | 61.5334               | <i>R57</i> | 3016.0            | 62.2202               | <i>R95</i>  | 2389.0            | 55.0889               |
| <i>R20</i> | 2741.0            | 59.3944               | <i>R58</i> | 2807.0            | 59.6338               | <i>R96</i>  | 3124.0            | 64.0771               |
| <i>R21</i> | 2883.0            | 60.6896               | <i>R59</i> | 2637.0            | 57.8778               | <i>R97</i>  | 3457.0            | 70.3582               |
| <i>R22</i> | 3255.0            | 64.9712               | <i>R60</i> | 2887.0            | 60.7785               | <i>R98</i>  | 2583.0            | 57.5036               |
| <i>R23</i> | 2780.0            | 60.01                 | <i>R61</i> | 2578.0            | 57.1243               | <i>R99</i>  | 3056.0            | 63.7019               |
| <i>R24</i> | 2948.0            | 61.8623               | <i>R62</i> | 3239.0            | 64.8055               | <i>R100</i> | 3236.0            | 64.6044               |
| <i>R25</i> | 2955.0            | 61.6259               | <i>R63</i> | 2663.0            | 58.8507               | <i>R101</i> | 2596.0            | 57.4737               |
| <i>R26</i> | 3191.0            | 64.6561               | <i>R64</i> | 3031.0            | 62.8699               | <i>R102</i> | 2530.0            | 57.0326               |
| <i>R27</i> | 2939.0            | 61.3329               | <i>R65</i> | 3191.0            | 64.698                | <i>R103</i> | 3048.0            | 63.3906               |
| <i>R28</i> | 2928.0            | 61.051                | <i>R66</i> | 3063.0            | 62.5359               | <i>R104</i> | 2602.0            | 57.7868               |
| <i>R29</i> | 3187.0            | 64.0739               | <i>R67</i> | 2723.0            | 58.7299               | <i>R105</i> | 2573.0            | 57.4307               |
| <i>R30</i> | 3093.0            | 62.8647               | <i>R68</i> | 3102.0            | 63.206                | <i>R106</i> | 2509.0            | 57.2233               |
| <i>R31</i> | 2839.0            | 60.3045               | <i>R69</i> | 3008.0            | 62.0011               | <i>R107</i> | 3453.0            | 69.9792               |
| <i>R32</i> | 2935.0            | 61.1582               | <i>R70</i> | 2614.0            | 57.9827               | <i>R108</i> | 2545.0            | 57.118                |
| <i>R33</i> | 2451.0            | 56.4877               | <i>R71</i> | 2718.0            | 59.0786               | <i>R109</i> | 2482.0            | 56.7034               |
| <i>R34</i> | 2814.0            | 60.005                | <i>R72</i> | 2867.0            | 60.6495               | <i>R110</i> | 2935.0            | 61.4644               |
| <i>R35</i> | 2912.0            | 61.624                | <i>R73</i> | 2707.0            | 59.3573               | <i>R111</i> | 2841.0            | 60.9965               |
| <i>R36</i> | 2820.0            | 60.4058               | <i>R74</i> | 2549.0            | 56.7578               | <i>R112</i> | 2497.0            | 56.3536               |
| <i>R37</i> | 2625.0            | 57.7863               | <i>R75</i> | 3319.0            | 66.7417               | <i>R113</i> | 2456.0            | 58.2178               |

**Fig. S1 b1.** (a) Histogram of thresholding the TEM image of the top surface of the AAO membrane with the chemical etching for 10 min. (b) The TEM image with the analyzed nanochannels after the thresholding. (c) Measurements of the sizes (diameter, unit: nm) of the analyzed nanochannels on the top surface of the AAO membrane.

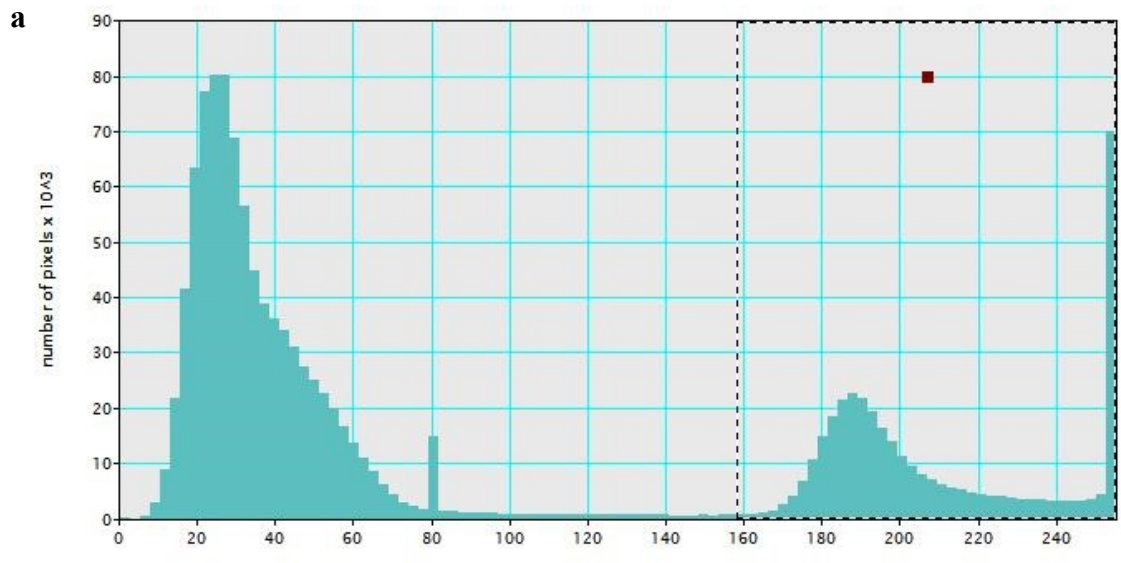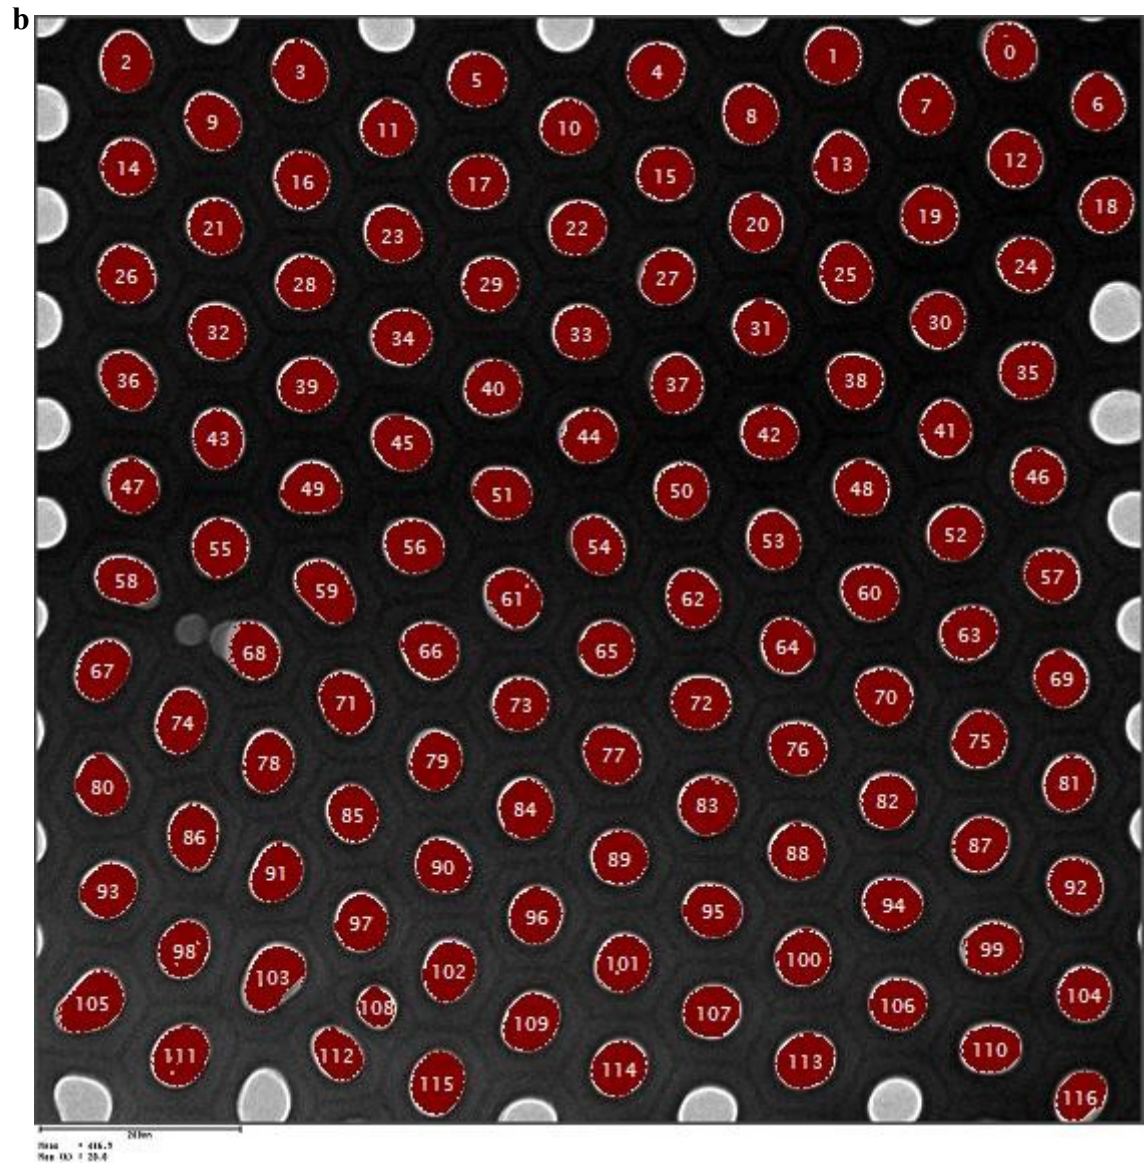



|     | <i>FilledArea</i> | <i>CircleDiameter</i> |     | <i>FilledArea</i> | <i>CircleDiameter</i> |      | <i>FilledArea</i> | <i>CircleDiameter</i> |
|-----|-------------------|-----------------------|-----|-------------------|-----------------------|------|-------------------|-----------------------|
| R0  | 2385.0            | 54.979                | R39 | 2527.0            | 56.5803               | R78  | 2499.0            | 56.5853               |
| R1  | 2507.0            | 56.2444               | R40 | 2542.0            | 56.6486               | R79  | 2471.0            | 56.1419               |
| R2  | 2486.0            | 56.2287               | R41 | 2314.0            | 54.1446               | R80  | 2497.0            | 56.4652               |
| R3  | 2687.0            | 58.5875               | R42 | 2431.0            | 55.3958               | R81  | 2306.0            | 54.0724               |
| R4  | 2568.0            | 56.9548               | R43 | 2421.0            | 55.5789               | R82  | 2449.0            | 55.6152               |
| R5  | 2525.0            | 56.4488               | R44 | 2473.0            | 55.9004               | R83  | 2762.0            | 59.0161               |
| R6  | 2361.0            | 54.692                | R45 | 2613.0            | 57.7747               | R84  | 2648.0            | 57.8426               |
| R7  | 2585.0            | 57.2023               | R46 | 2365.0            | 54.5706               | R85  | 2322.0            | 54.3714               |
| R8  | 2626.0            | 57.7382               | R47 | 2223.0            | 53.061                | R86  | 2616.0            | 58.5354               |
| R9  | 2511.0            | 56.5831               | R48 | 2460.0            | 55.7557               | R87  | 2490.0            | 56.1533               |
| R10 | 2503.0            | 56.2327               | R49 | 2541.0            | 57.0904               | R88  | 2561.0            | 56.7946               |
| R11 | 2490.0            | 56.0033               | R50 | 2401.0            | 54.9957               | R89  | 2460.0            | 55.68                 |
| R12 | 2470.0            | 55.8405               | R51 | 2459.0            | 55.9579               | R90  | 2396.0            | 55.1461               |
| R13 | 2591.0            | 57.4309               | R52 | 2459.0            | 55.6812               | R91  | 2395.0            | 55.6194               |
| R14 | 2467.0            | 55.8186               | R53 | 2497.0            | 56.3422               | R92  | 2438.0            | 55.5566               |
| R15 | 2451.0            | 55.5807               | R54 | 2437.0            | 56.0736               | R93  | 2507.0            | 56.3904               |
| R16 | 2517.0            | 56.3735               | R55 | 2618.0            | 57.4961               | R94  | 2525.0            | 56.6127               |
| R17 | 2574.0            | 57.0733               | R56 | 2594.0            | 57.3637               | R95  | 2508.0            | 56.3659               |
| R18 | 2382.0            | 54.8596               | R57 | 2329.0            | 54.3182               | R96  | 2449.0            | 55.5352               |
| R19 | 2578.0            | 57.0106               | R58 | 2329.0            | 55.3426               | R97  | 2462.0            | 55.8514               |
| R20 | 2481.0            | 55.9733               | R59 | 2733.0            | 61.067                | R98  | 2315.0            | 54.3925               |
| R21 | 2459.0            | 55.7407               | R60 | 2526.0            | 56.5218               | R99  | 2514.0            | 56.8708               |
| R22 | 2490.0            | 56.0846               | R61 | 2587.0            | 57.5564               | R100 | 2500.0            | 56.1541               |
| R23 | 2581.0            | 57.2588               | R62 | 2469.0            | 55.9465               | R101 | 2527.0            | 56.585                |
| R24 | 2391.0            | 54.8849               | R63 | 2480.0            | 56.1341               | R102 | 2557.0            | 57.2041               |
| R25 | 2529.0            | 56.7501               | R64 | 2325.0            | 54.2545               | R103 | 2937.0            | 64.2105               |
| R26 | 2639.0            | 57.8196               | R65 | 2421.0            | 55.2546               | R104 | 2320.0            | 54.0686               |
| R27 | 2426.0            | 55.564                | R66 | 2576.0            | 57.2036               | R105 | 3077.0            | 64.6539               |
| R28 | 2545.0            | 56.7003               | R67 | 2546.0            | 57.4861               | R106 | 2378.0            | 54.8118               |
| R29 | 2450.0            | 55.5967               | R68 | 2340.0            | 55.5953               | R107 | 2454.0            | 55.8584               |
| R30 | 2420.0            | 55.2453               | R69 | 2409.0            | 55.1448               | R108 | 1250.0            | 39.721                |
| R31 | 2396.0            | 54.8945               | R70 | 2562.0            | 56.997                | R109 | 2634.0            | 58.0326               |
| R32 | 2584.0            | 57.1176               | R71 | 2646.0            | 58.3942               | R110 | 2367.0            | 55.234                |
| R33 | 2467.0            | 55.822                | R72 | 2570.0            | 57.0884               | R111 | 2752.0            | 59.3963               |
| R34 | 2666.0            | 58.0666               | R73 | 2399.0            | 55.0125               | R112 | 2027.0            | 51.3734               |
| R35 | 2503.0            | 56.2141               | R74 | 2618.0            | 58.4887               | R113 | 2613.0            | 57.5258               |
| R36 | 2581.0            | 57.7064               | R75 | 2454.0            | 55.6645               | R114 | 2480.0            | 56.0281               |
| R37 | 2465.0            | 56.015                | R76 | 2455.0            | 55.7906               | R115 | 2722.0            | 58.9894               |
| R38 | 2453.0            | 55.7788               | R77 | 2617.0            | 57.6509               | R116 | 1981.0            | 50.9957               |

**Fig. S1 b2.** (a) Histogram of thresholding the TEM image of the bottom surface of the AAO membrane with the chemical etching for 10 min. (b) The TEM image with the analyzed nanochannels after the thresholding. (c) Measurements of the sizes (diameter, unit: nm) of the analyzed nanochannels on the bottom surface of the AAO membrane.

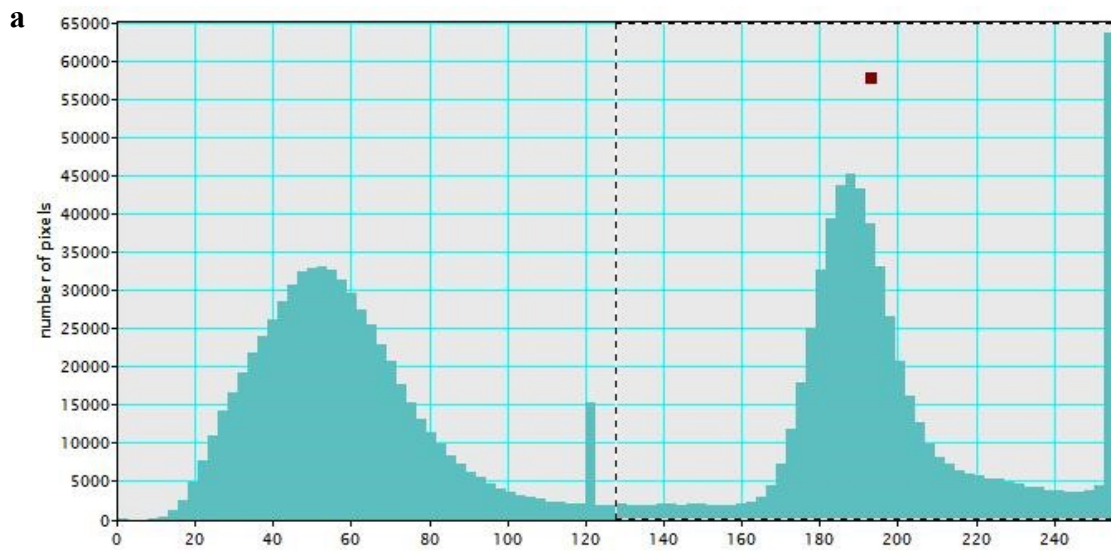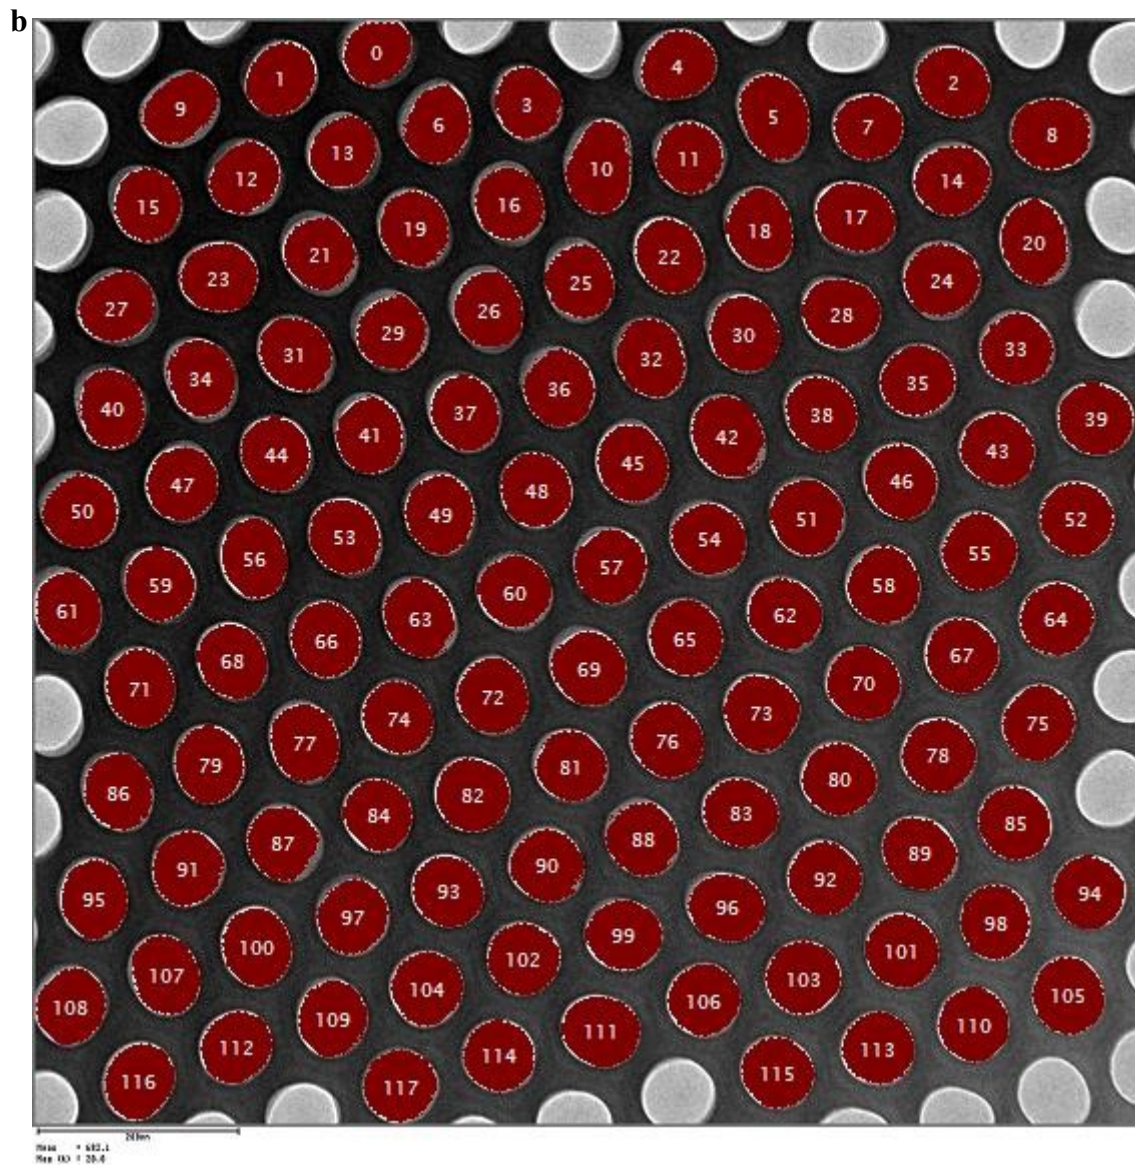

|     | <i>FilledArea</i> | <i>CrcDiameter</i> |
|-----|-------------------|--------------------|
| R0  | 3552.0            | 67.9835            |
| R1  | 4116.0            | 72.6253            |
| R2  | 4189.0            | 73.0959            |
| R3  | 3835.0            | 70.1718            |
| R4  | 4206.0            | 73.6827            |
| R5  | 4816.0            | 79.4783            |
| R6  | 4152.0            | 73.6957            |
| R7  | 3676.0            | 68.2294            |
| R8  | 4664.0            | 77.2519            |
| R9  | 4128.0            | 74.0236            |
| R10 | 4847.0            | 81.1199            |
| R11 | 3885.0            | 70.4055            |
| R12 | 3998.0            | 71.9283            |
| R13 | 3865.0            | 71.2642            |
| R14 | 4314.0            | 74.3494            |
| R15 | 3978.0            | 71.2075            |
| R16 | 4104.0            | 72.8015            |
| R17 | 4473.0            | 75.8051            |
| R18 | 4389.0            | 75.5791            |
| R19 | 4252.0            | 74.2087            |
| R20 | 4534.0            | 77.2444            |
| R21 | 4202.0            | 73.5527            |
| R22 | 4218.0            | 73.4022            |
| R23 | 4416.0            | 75.0325            |
| R24 | 4430.0            | 75.3533            |
| R25 | 4112.0            | 72.8282            |
| R26 | 4272.0            | 74.1326            |
| R27 | 4227.0            | 73.7177            |
| R28 | 4418.0            | 75.2791            |
| R29 | 4206.0            | 73.8589            |
| R30 | 4320.0            | 74.2817            |
| R31 | 4313.0            | 74.3429            |
| R32 | 4336.0            | 74.7032            |
| R33 | 4233.0            | 73.4511            |
| R34 | 4295.0            | 74.4427            |
| R35 | 4262.0            | 73.6073            |
| R36 | 4374.0            | 74.8592            |
| R37 | 4227.0            | 73.7537            |
| R38 | 4274.0            | 73.6014            |
| R39 | 4408.0            | 74.7371            |

  

|     | <i>FilledArea</i> | <i>CrcDiameter</i> |
|-----|-------------------|--------------------|
| R40 | 4254.0            | 74.3755            |
| R41 | 4175.0            | 73.4702            |
| R42 | 4781.0            | 79.0817            |
| R43 | 4366.0            | 74.4546            |
| R44 | 4134.0            | 72.3801            |
| R45 | 4489.0            | 75.7973            |
| R46 | 4369.0            | 74.6302            |
| R47 | 4292.0            | 73.7864            |
| R48 | 4280.0            | 73.692             |
| R49 | 4415.0            | 75.2287            |
| R50 | 4409.0            | 75.241             |
| R51 | 4473.0            | 75.4518            |
| R52 | 4349.0            | 74.216             |
| R53 | 4328.0            | 74.2827            |
| R54 | 4292.0            | 74.1086            |
| R55 | 4565.0            | 76.1575            |
| R56 | 4271.0            | 74.1906            |
| R57 | 4316.0            | 74.4316            |
| R58 | 4563.0            | 76.3833            |
| R59 | 4169.0            | 72.7993            |
| R60 | 4255.0            | 73.8808            |
| R61 | 4097.0            | 72.8124            |
| R62 | 4236.0            | 73.3673            |
| R63 | 4450.0            | 75.857             |
| R64 | 4289.0            | 73.7691            |
| R65 | 4492.0            | 75.5307            |
| R66 | 4265.0            | 73.6193            |
| R67 | 4404.0            | 74.6551            |
| R68 | 4235.0            | 73.4903            |
| R69 | 4501.0            | 75.9696            |
| R70 | 4336.0            | 74.254             |
| R71 | 4364.0            | 74.6168            |
| R72 | 4356.0            | 74.4979            |
| R73 | 4611.0            | 76.9095            |
| R74 | 4138.0            | 72.4885            |
| R75 | 4348.0            | 74.2481            |
| R76 | 4337.0            | 74.1792            |
| R77 | 4338.0            | 74.666             |
| R78 | 4375.0            | 74.3719            |
| R79 | 4341.0            | 74.3378            |

  

|      | <i>FilledArea</i> | <i>CrcDiameter</i> |
|------|-------------------|--------------------|
| R80  | 4369.0            | 74.3152            |
| R81  | 4124.0            | 72.6245            |
| R82  | 4455.0            | 75.1245            |
| R83  | 4192.0            | 72.9685            |
| R84  | 3966.0            | 70.8961            |
| R85  | 4317.0            | 74.0235            |
| R86  | 4228.0            | 73.8903            |
| R87  | 4168.0            | 73.5076            |
| R88  | 4307.0            | 74.442             |
| R89  | 4317.0            | 74.3104            |
| R90  | 4306.0            | 74.0989            |
| R91  | 4274.0            | 73.8365            |
| R92  | 4319.0            | 73.9769            |
| R93  | 4123.0            | 72.2203            |
| R94  | 4293.0            | 73.6768            |
| R95  | 4303.0            | 74.3797            |
| R96  | 4254.0            | 73.8752            |
| R97  | 4239.0            | 73.4896            |
| R98  | 4200.0            | 72.9818            |
| R99  | 4314.0            | 74.0355            |
| R100 | 4456.0            | 75.4674            |
| R101 | 4332.0            | 74.0334            |
| R102 | 4204.0            | 72.8714            |
| R103 | 4420.0            | 74.6968            |
| R104 | 4321.0            | 74.0493            |
| R105 | 4463.0            | 75.4159            |
| R106 | 4185.0            | 72.936             |
| R107 | 4426.0            | 75.5251            |
| R108 | 4315.0            | 74.2294            |
| R109 | 4235.0            | 73.6303            |
| R110 | 4230.0            | 73.1997            |
| R111 | 4500.0            | 75.6899            |
| R112 | 4130.0            | 72.4951            |
| R113 | 4253.0            | 73.4124            |
| R114 | 4154.0            | 72.5939            |
| R115 | 4164.0            | 72.6914            |
| R116 | 4345.0            | 74.6353            |
| R117 | 4287.0            | 73.9779            |

**Fig. S1 c1.** (a) Histogram of thresholding the TEM image of the top surface of the AAO membrane with the chemical etching for 35 min. (b) The TEM image with the analyzed nanochannels after the thresholding. (c) Measurements of the sizes (diameter, unit: nm) of the analyzed nanochannels on the top surface of the AAO membrane.

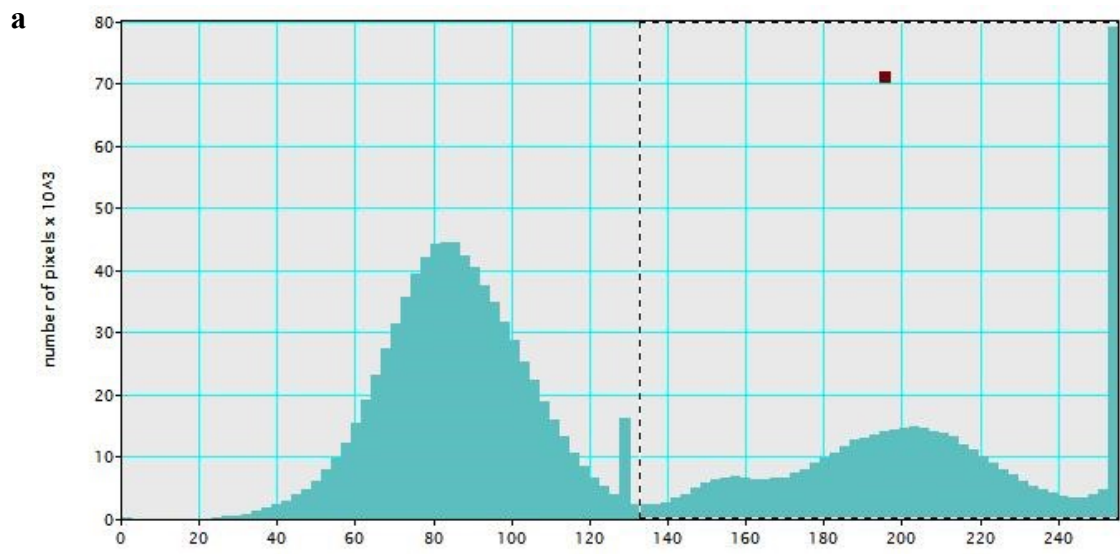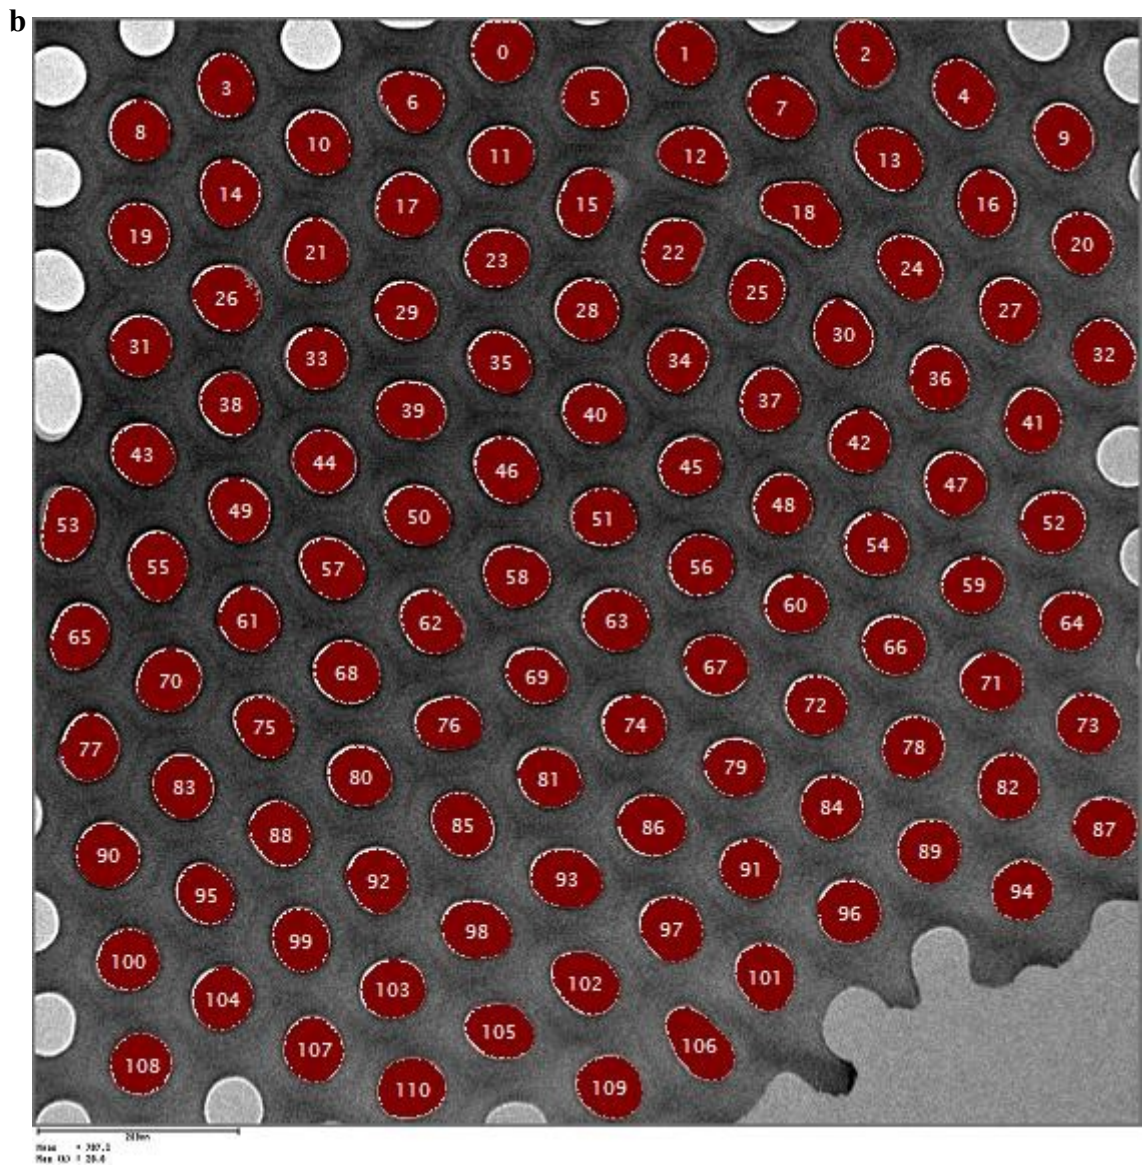

**c**

|            | <i>FilledArea</i> | <i>QrcD anet ε</i> |            | <i>FilledArea</i> | <i>QrcD anet ε</i> |             | <i>FilledArea</i> | <i>QrcD anet ε</i> |
|------------|-------------------|--------------------|------------|-------------------|--------------------|-------------|-------------------|--------------------|
| <i>R0</i>  | 3169.0            | 63.5654            | <i>R37</i> | 3010.0            | 61.7591            | <i>R74</i>  | 3076.0            | 62.4755            |
| <i>R1</i>  | 3108.0            | 62.8887            | <i>R38</i> | 2997.0            | 61.7537            | <i>R75</i>  | 2891.0            | 60.9949            |
| <i>R2</i>  | 3113.0            | 63.5111            | <i>R39</i> | 3245.0            | 64.5928            | <i>R76</i>  | 2885.0            | 61.0949            |
| <i>R3</i>  | 2864.0            | 60.3896            | <i>R40</i> | 2982.0            | 61.5867            | <i>R77</i>  | 3122.0            | 63.279             |
| <i>R4</i>  | 3269.0            | 65.1316            | <i>R41</i> | 2928.0            | 61.015             | <i>R78</i>  | 3102.0            | 62.7675            |
| <i>R5</i>  | 3218.0            | 64.0918            | <i>R42</i> | 3026.0            | 61.935             | <i>R79</i>  | 2931.0            | 61.0103            |
| <i>R6</i>  | 3046.0            | 63.1114            | <i>R43</i> | 3021.0            | 61.9381            | <i>R80</i>  | 3094.0            | 62.7077            |
| <i>R7</i>  | 3332.0            | 65.3778            | <i>R44</i> | 3134.0            | 63.0758            | <i>R81</i>  | 3044.0            | 62.4396            |
| <i>R8</i>  | 2937.0            | 60.8814            | <i>R45</i> | 2937.0            | 61.0122            | <i>R82</i>  | 3295.0            | 64.7358            |
| <i>R9</i>  | 3106.0            | 63.1597            | <i>R46</i> | 3394.0            | 65.8991            | <i>R83</i>  | 3084.0            | 62.5503            |
| <i>R10</i> | 3292.0            | 64.6593            | <i>R47</i> | 3155.0            | 63.3163            | <i>R84</i>  | 3226.0            | 63.8954            |
| <i>R11</i> | 3060.0            | 62.3516            | <i>R48</i> | 2839.0            | 60.0119            | <i>R85</i>  | 3132.0            | 63.3711            |
| <i>R12</i> | 3110.0            | 64.5936            | <i>R49</i> | 3097.0            | 62.8379            | <i>R86</i>  | 3394.0            | 65.6363            |
| <i>R13</i> | 3329.0            | 65.6322            | <i>R50</i> | 3113.0            | 63.0164            | <i>R87</i>  | 3174.0            | 63.6983            |
| <i>R14</i> | 3155.0            | 63.3172            | <i>R51</i> | 3001.0            | 61.9512            | <i>R88</i>  | 3126.0            | 63.2619            |
| <i>R15</i> | 3137.0            | 64.215             | <i>R52</i> | 3221.0            | 63.8431            | <i>R89</i>  | 3249.0            | 64.3007            |
| <i>R16</i> | 3055.0            | 62.3345            | <i>R53</i> | 3204.0            | 66.1963            | <i>R90</i>  | 3240.0            | 64.0746            |
| <i>R17</i> | 3202.0            | 63.6172            | <i>R54</i> | 3259.0            | 64.1958            | <i>R91</i>  | 2909.0            | 60.8939            |
| <i>R18</i> | 3632.0            | 73.0501            | <i>R55</i> | 3229.0            | 64.2947            | <i>R92</i>  | 3164.0            | 63.4827            |
| <i>R19</i> | 2979.0            | 61.3815            | <i>R56</i> | 3173.0            | 63.3034            | <i>R93</i>  | 3431.0            | 66.6906            |
| <i>R20</i> | 2977.0            | 61.5192            | <i>R57</i> | 3075.0            | 62.8915            | <i>R94</i>  | 2966.0            | 61.4734            |
| <i>R21</i> | 3293.0            | 64.9319            | <i>R58</i> | 3238.0            | 64.1836            | <i>R95</i>  | 2801.0            | 59.789             |
| <i>R22</i> | 3225.0            | 64.9882            | <i>R59</i> | 2890.0            | 60.5961            | <i>R96</i>  | 3270.0            | 64.4427            |
| <i>R23</i> | 3013.0            | 62.0269            | <i>R60</i> | 3052.0            | 62.2018            | <i>R97</i>  | 3332.0            | 65.1767            |
| <i>R24</i> | 3199.0            | 64.472             | <i>R61</i> | 3078.0            | 62.4383            | <i>R98</i>  | 3349.0            | 65.7015            |
| <i>R25</i> | 2830.0            | 60.0526            | <i>R62</i> | 3114.0            | 63.661             | <i>R99</i>  | 2928.0            | 61.0447            |
| <i>R26</i> | 3529.0            | 67.2563            | <i>R63</i> | 3294.0            | 64.6231            | <i>R100</i> | 3073.0            | 62.4453            |
| <i>R27</i> | 3115.0            | 63.1057            | <i>R64</i> | 2943.0            | 61.0869            | <i>R101</i> | 3214.0            | 64.494             |
| <i>R28</i> | 3119.0            | 62.8967            | <i>R65</i> | 3024.0            | 62.3407            | <i>R102</i> | 3351.0            | 66.0961            |
| <i>R29</i> | 2918.0            | 60.8183            | <i>R66</i> | 3050.0            | 62.1399            | <i>R103</i> | 3131.0            | 63.1179            |
| <i>R30</i> | 3088.0            | 62.8346            | <i>R67</i> | 3124.0            | 63.0253            | <i>R104</i> | 3061.0            | 62.2325            |
| <i>R31</i> | 3002.0            | 61.5385            | <i>R68</i> | 3339.0            | 65.1154            | <i>R105</i> | 3100.0            | 63.7486            |
| <i>R32</i> | 3225.0            | 64.1258            | <i>R69</i> | 2729.0            | 59.0007            | <i>R106</i> | 3530.0            | 70.9099            |
| <i>R33</i> | 3009.0            | 61.8969            | <i>R70</i> | 3242.0            | 64.1237            | <i>R107</i> | 3138.0            | 63.2225            |
| <i>R34</i> | 2988.0            | 61.5507            | <i>R71</i> | 2967.0            | 61.4773            | <i>R108</i> | 3011.0            | 61.8929            |
| <i>R35</i> | 3002.0            | 61.931             | <i>R72</i> | 2983.0            | 61.4481            | <i>R109</i> | 3365.0            | 65.785             |
| <i>R36</i> | 3024.0            | 62.0527            | <i>R73</i> | 3072.0            | 62.5322            | <i>R110</i> | 3368.0            | 65.7676            |

**Fig. S1 c2.** (a) Histogram of thresholding the TEM image of the bottom surface of the AAO membrane with the chemical etching for 35 min. (b) The TEM image with the analyzed nanochannels after the thresholding. (c) Measurements of the sizes (diameter, unit: nm) of the analyzed nanochannels on the bottom surface of the AAO membrane.

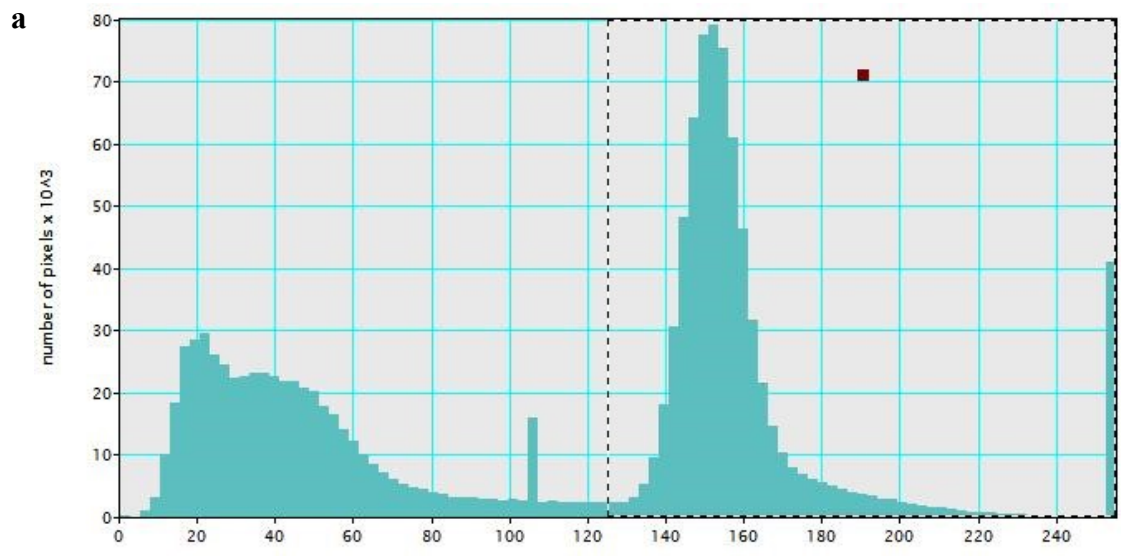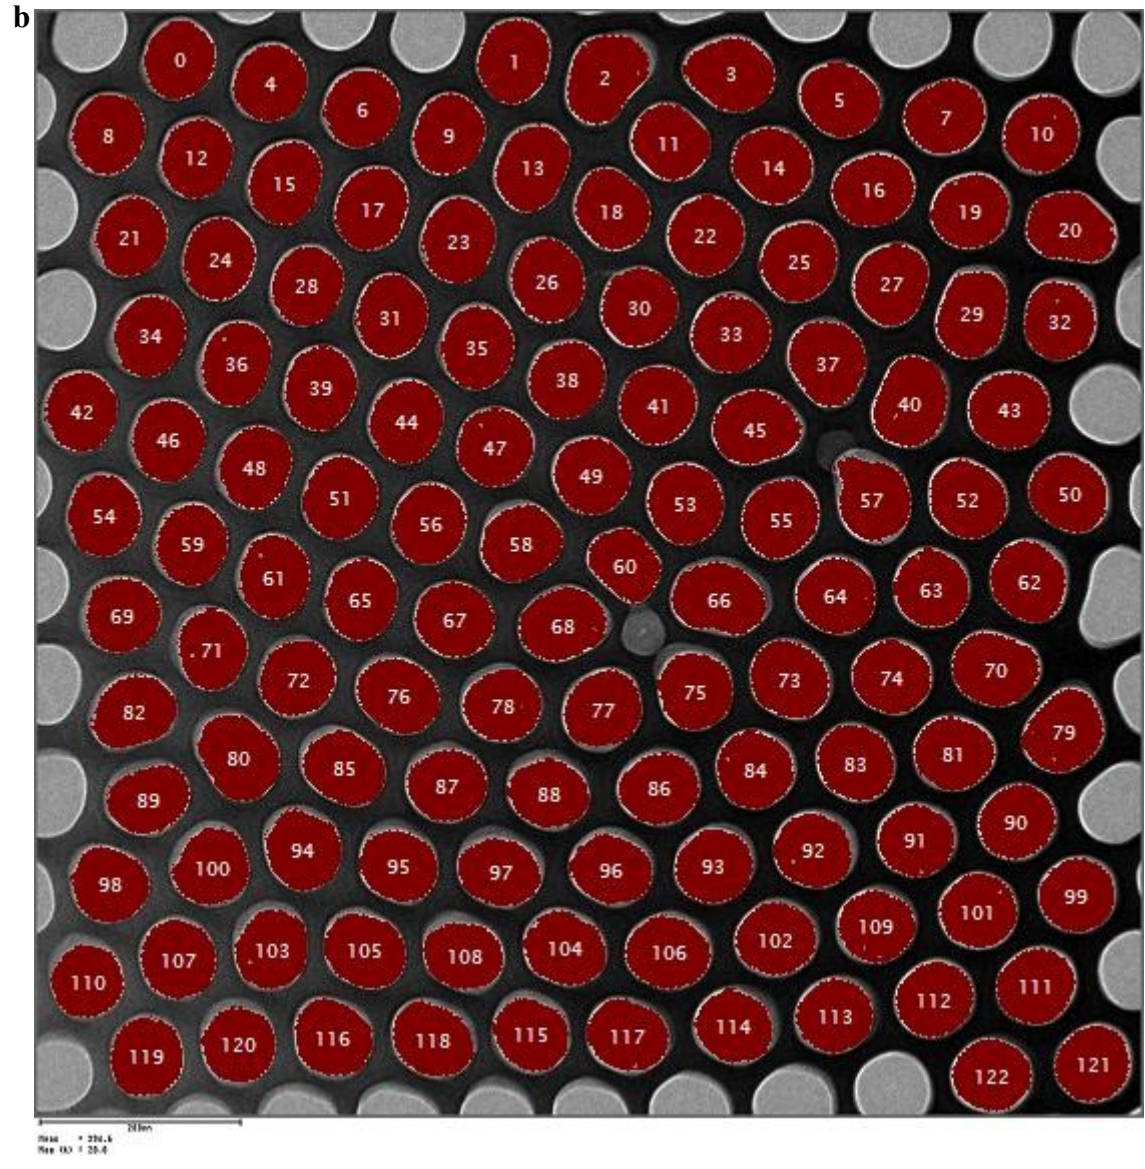

**c**

|            | <i>FilledArea</i> | <i>QrcD anet e</i> |            | <i>FilledArea</i> | <i>QrcD anet e</i> |             | <i>FilledArea</i> | <i>QrcD anet e</i> |
|------------|-------------------|--------------------|------------|-------------------|--------------------|-------------|-------------------|--------------------|
| <i>R0</i>  | 4568.0            | 76.5802            | <i>R41</i> | 4863.0            | 78.4527            | <i>R82</i>  | 4945.0            | 80.5931            |
| <i>R1</i>  | 4968.0            | 79.8858            | <i>R42</i> | 4675.0            | 77.3738            | <i>R83</i>  | 4740.0            | 77.7449            |
| <i>R2</i>  | 5630.0            | 87.4328            | <i>R43</i> | 5113.0            | 80.5808            | <i>R84</i>  | 4853.0            | 78.5633            |
| <i>R3</i>  | 5263.0            | 82.7199            | <i>R44</i> | 4944.0            | 79.5753            | <i>R85</i>  | 4932.0            | 80.5126            |
| <i>R4</i>  | 4617.0            | 76.7469            | <i>R45</i> | 5237.0            | 82.7838            | <i>R86</i>  | 4706.0            | 77.7905            |
| <i>R5</i>  | 4752.0            | 77.9552            | <i>R46</i> | 4861.0            | 78.8848            | <i>R87</i>  | 4742.0            | 77.9933            |
| <i>R6</i>  | 4771.0            | 77.9496            | <i>R47</i> | 4822.0            | 78.1981            | <i>R88</i>  | 4526.0            | 76.4609            |
| <i>R7</i>  | 4834.0            | 78.5741            | <i>R48</i> | 4809.0            | 78.6584            | <i>R89</i>  | 4623.0            | 78.3772            |
| <i>R8</i>  | 4810.0            | 78.4675            | <i>R49</i> | 4847.0            | 78.3599            | <i>R90</i>  | 4617.0            | 76.5033            |
| <i>R9</i>  | 4690.0            | 77.5035            | <i>R50</i> | 4869.0            | 79.0277            | <i>R91</i>  | 4450.0            | 75.4477            |
| <i>R10</i> | 4694.0            | 77.4146            | <i>R51</i> | 4999.0            | 79.8362            | <i>R92</i>  | 4722.0            | 77.997             |
| <i>R11</i> | 4673.0            | 77.1719            | <i>R52</i> | 4974.0            | 79.6466            | <i>R93</i>  | 4675.0            | 77.0076            |
| <i>R12</i> | 4623.0            | 76.8362            | <i>R53</i> | 4966.0            | 79.3182            | <i>R94</i>  | 4950.0            | 80.1156            |
| <i>R13</i> | 5118.0            | 81.7028            | <i>R54</i> | 4832.0            | 78.7846            | <i>R95</i>  | 4647.0            | 77.607             |
| <i>R14</i> | 4904.0            | 78.9611            | <i>R55</i> | 4944.0            | 79.4761            | <i>R96</i>  | 4641.0            | 77.8432            |
| <i>R15</i> | 4903.0            | 79.5249            | <i>R56</i> | 4819.0            | 78.4469            | <i>R97</i>  | 4600.0            | 77.7291            |
| <i>R16</i> | 4890.0            | 78.9581            | <i>R57</i> | 5193.0            | 85.6847            | <i>R98</i>  | 4748.0            | 78.2325            |
| <i>R17</i> | 4909.0            | 79.3493            | <i>R58</i> | 4963.0            | 79.8565            | <i>R99</i>  | 4531.0            | 75.8724            |
| <i>R18</i> | 4846.0            | 78.9165            | <i>R59</i> | 4750.0            | 78.2428            | <i>R100</i> | 4780.0            | 79.4727            |
| <i>R19</i> | 4772.0            | 77.8291            | <i>R60</i> | 3977.0            | 72.5839            | <i>R101</i> | 4693.0            | 77.1865            |
| <i>R20</i> | 5093.0            | 82.1633            | <i>R61</i> | 4847.0            | 79.0639            | <i>R102</i> | 4744.0            | 78.0927            |
| <i>R21</i> | 4640.0            | 77.4865            | <i>R62</i> | 4913.0            | 79.3923            | <i>R103</i> | 4723.0            | 78.2459            |
| <i>R22</i> | 4923.0            | 78.9377            | <i>R63</i> | 4723.0            | 77.4985            | <i>R104</i> | 4906.0            | 79.5246            |
| <i>R23</i> | 5101.0            | 80.8191            | <i>R64</i> | 4851.0            | 78.5172            | <i>R105</i> | 4967.0            | 80.0389            |
| <i>R24</i> | 4820.0            | 78.5646            | <i>R65</i> | 4746.0            | 77.885             | <i>R106</i> | 4997.0            | 80.1985            |
| <i>R25</i> | 4920.0            | 79.1804            | <i>R66</i> | 5475.0            | 85.5046            | <i>R107</i> | 4893.0            | 79.0327            |
| <i>R26</i> | 4988.0            | 79.8756            | <i>R67</i> | 4817.0            | 78.1661            | <i>R108</i> | 4440.0            | 76.5349            |
| <i>R27</i> | 4934.0            | 79.5847            | <i>R68</i> | 5091.0            | 81.4523            | <i>R109</i> | 4510.0            | 75.9942            |
| <i>R28</i> | 4637.0            | 76.9871            | <i>R69</i> | 4654.0            | 77.4856            | <i>R110</i> | 4338.0            | 74.852             |
| <i>R29</i> | 5091.0            | 81.9846            | <i>R70</i> | 5159.0            | 81.6563            | <i>R111</i> | 4760.0            | 77.742             |
| <i>R30</i> | 4860.0            | 78.6165            | <i>R71</i> | 4582.0            | 76.8288            | <i>R112</i> | 4740.0            | 77.5891            |
| <i>R31</i> | 4898.0            | 79.1538            | <i>R72</i> | 4679.0            | 77.4834            | <i>R113</i> | 4567.0            | 76.194             |
| <i>R32</i> | 4581.0            | 76.4989            | <i>R73</i> | 4997.0            | 79.9619            | <i>R114</i> | 4579.0            | 76.5753            |
| <i>R33</i> | 4998.0            | 79.7423            | <i>R74</i> | 4676.0            | 77.2001            | <i>R115</i> | 4450.0            | 75.9733            |
| <i>R34</i> | 4755.0            | 78.2507            | <i>R75</i> | 4732.0            | 77.6406            | <i>R116</i> | 4871.0            | 79.2332            |
| <i>R35</i> | 4917.0            | 79.3002            | <i>R76</i> | 4986.0            | 80.099             | <i>R117</i> | 4744.0            | 78.267             |
| <i>R36</i> | 4816.0            | 79.3333            | <i>R77</i> | 4914.0            | 79.5299            | <i>R118</i> | 4860.0            | 79.5717            |
| <i>R37</i> | 5234.0            | 82.1829            | <i>R78</i> | 4612.0            | 76.7019            | <i>R119</i> | 4771.0            | 78.3018            |
| <i>R38</i> | 4819.0            | 78.2075            | <i>R79</i> | 5172.0            | 81.9411            | <i>R120</i> | 4598.0            | 76.8264            |
| <i>R39</i> | 4935.0            | 79.5547            | <i>R80</i> | 5527.0            | 85.2271            | <i>R121</i> | 4632.0            | 76.7481            |
| <i>R40</i> | 5380.0            | 83.9321            | <i>R81</i> | 4759.0            | 77.9088            | <i>R122</i> | 4717.0            | 77.4152            |

**Fig. S1 d1.** (a) Histogram of thresholding the TEM image of the top surface of the AAO membranewiththe chemical etching for 60 min. (b) The TEM image with the analyzed nanochannels after the thresholding. (c) Measurements of the sizes (diameter, unit: nm) of the analyzed nanochannels on the top surface of the AAO membrane.

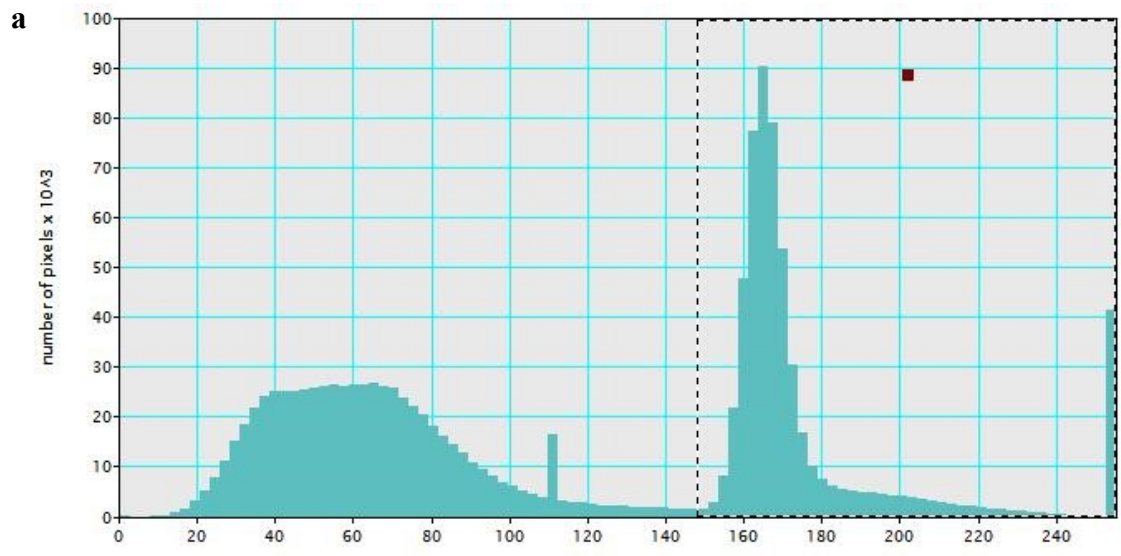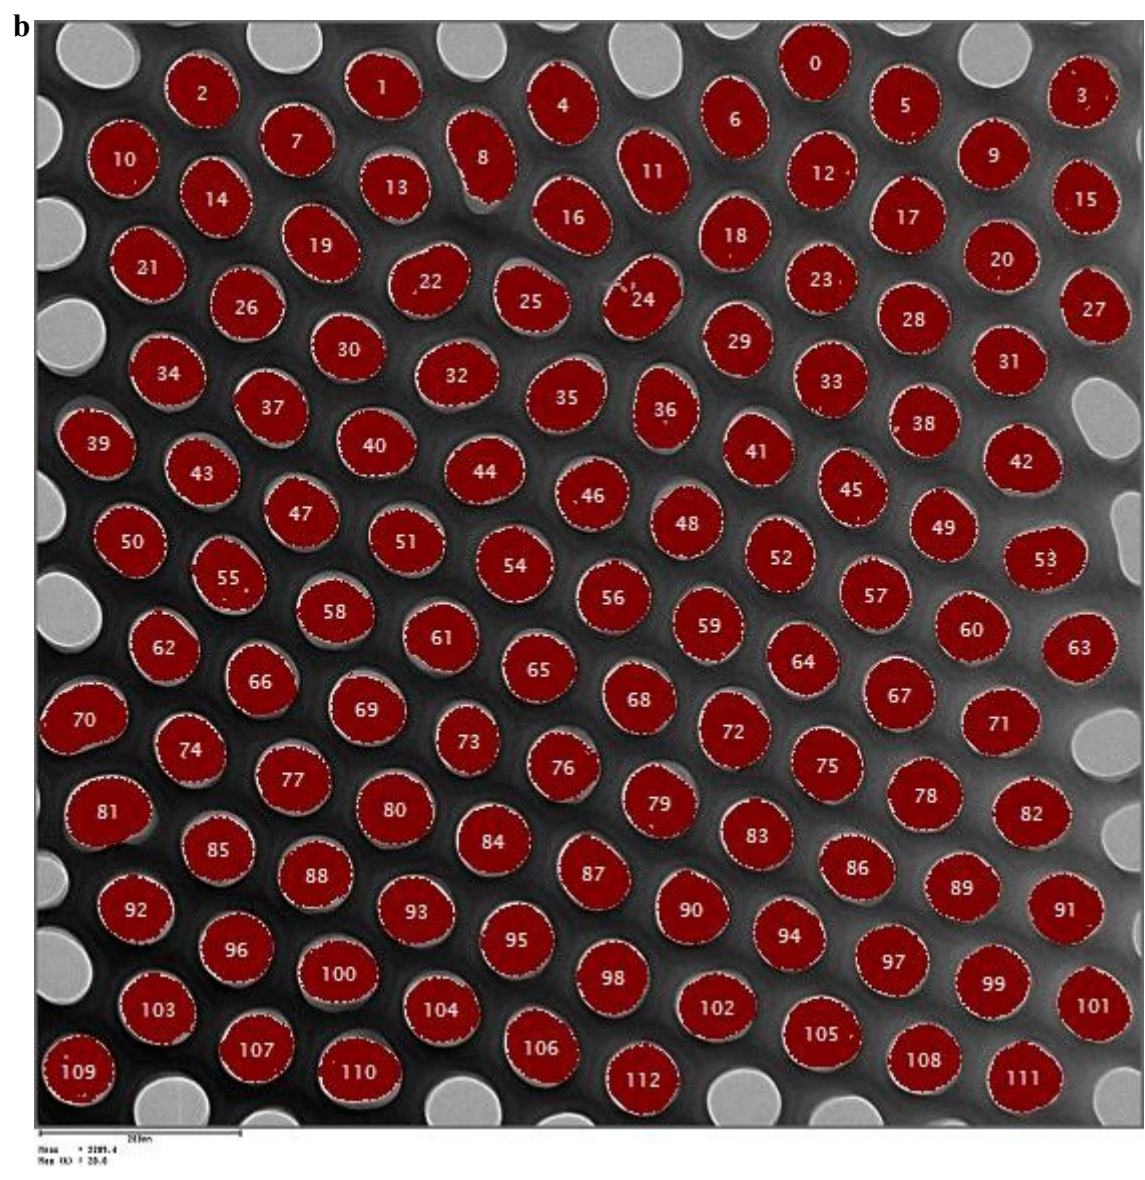



|     | <i>FilledArea</i> | <i>QrcD anet e</i> |     | <i>FilledArea</i> | <i>QrcD anet e</i> |      | <i>FilledArea</i> | <i>QrcD anet e</i> |
|-----|-------------------|--------------------|-----|-------------------|--------------------|------|-------------------|--------------------|
| R0  | 4351.0            | 74.4814            | R38 | 3924.0            | 70.5693            | R76  | 3794.0            | 70.0497            |
| R1  | 3913.0            | 71.1496            | R39 | 3989.0            | 72.4125            | R77  | 3984.0            | 71.668             |
| R2  | 4176.0            | 73.2114            | R40 | 4084.0            | 72.8666            | R78  | 4287.0            | 73.7957            |
| R3  | 3898.0            | 70.5541            | R41 | 4004.0            | 71.6967            | R79  | 4191.0            | 73.1567            |
| R4  | 4513.0            | 76.2908            | R42 | 4191.0            | 73.6599            | R80  | 4398.0            | 74.7588            |
| R5  | 4283.0            | 73.8512            | R43 | 3826.0            | 70.5926            | R81  | 4820.0            | 79.0982            |
| R6  | 4279.0            | 74.6841            | R44 | 4151.0            | 73.4741            | R82  | 4268.0            | 73.8212            |
| R7  | 4110.0            | 72.3599            | R45 | 3985.0            | 72.0252            | R83  | 4004.0            | 71.2485            |
| R8  | 4731.0            | 81.1929            | R46 | 4025.0            | 71.699             | R84  | 4078.0            | 72.135             |
| R9  | 3886.0            | 70.3717            | R47 | 3995.0            | 71.7955            | R85  | 3788.0            | 69.7833            |
| R10 | 4314.0            | 74.0581            | R48 | 4066.0            | 72.0314            | R86  | 3922.0            | 71.0941            |
| R11 | 4518.0            | 77.4906            | R49 | 3807.0            | 69.612             | R87  | 4048.0            | 72.4078            |
| R12 | 4217.0            | 73.3471            | R50 | 3961.0            | 71.2015            | R88  | 3964.0            | 71.4014            |
| R13 | 3746.0            | 69.4789            | R51 | 3828.0            | 70.2516            | R89  | 3969.0            | 71.0538            |
| R14 | 4281.0            | 74.4724            | R52 | 4040.0            | 71.7557            | R90  | 4163.0            | 72.837             |
| R15 | 3885.0            | 70.6437            | R53 | 4237.0            | 74.8735            | R91  | 4200.0            | 73.2581            |
| R16 | 4548.0            | 77.3318            | R54 | 4458.0            | 75.2399            | R92  | 3977.0            | 71.5431            |
| R17 | 4510.0            | 75.7672            | R55 | 4163.0            | 73.5554            | R93  | 4059.0            | 72.0638            |
| R18 | 4167.0            | 72.973             | R56 | 4114.0            | 72.2912            | R94  | 3999.0            | 71.4423            |
| R19 | 4461.0            | 76.6444            | R57 | 4034.0            | 71.7824            | R95  | 4212.0            | 73.0933            |
| R20 | 4187.0            | 73.0346            | R58 | 3901.0            | 71.4232            | R96  | 4040.0            | 71.5664            |
| R21 | 4240.0            | 73.9524            | R59 | 4108.0            | 72.2959            | R97  | 4077.0            | 71.9553            |
| R22 | 4469.0            | 76.6027            | R60 | 3995.0            | 71.4537            | R98  | 4154.0            | 72.6587            |
| R23 | 3844.0            | 69.9344            | R61 | 3983.0            | 71.5773            | R99  | 4280.0            | 73.6209            |
| R24 | 4703.0            | 79.1102            | R62 | 3827.0            | 70.4823            | R100 | 4043.0            | 72.8003            |
| R25 | 3940.0            | 72.3725            | R63 | 4077.0            | 72.2955            | R101 | 4218.0            | 73.4581            |
| R26 | 4087.0            | 72.3714            | R64 | 4009.0            | 71.5543            | R102 | 4099.0            | 72.5999            |
| R27 | 4042.0            | 72.2685            | R65 | 3958.0            | 70.8915            | R103 | 4217.0            | 73.7076            |
| R28 | 4035.0            | 71.6612            | R66 | 3906.0            | 70.6968            | R104 | 3960.0            | 71.7782            |
| R29 | 3946.0            | 70.9561            | R67 | 4100.0            | 72.3055            | R105 | 4474.0            | 75.5897            |
| R30 | 3862.0            | 70.4513            | R68 | 4087.0            | 72.3434            | R106 | 4264.0            | 74.1156            |
| R31 | 4039.0            | 71.7147            | R69 | 4150.0            | 73.5714            | R107 | 4007.0            | 71.3977            |
| R32 | 4241.0            | 74.5296            | R70 | 4725.0            | 79.9389            | R108 | 3994.0            | 71.2198            |
| R33 | 4344.0            | 74.1346            | R71 | 4141.0            | 73.1097            | R109 | 3833.0            | 69.7446            |
| R34 | 4178.0            | 73.3488            | R72 | 4329.0            | 74.4306            | R110 | 4302.0            | 75.034             |
| R35 | 4505.0            | 76.6008            | R73 | 3447.0            | 66.2277            | R111 | 4135.0            | 72.6054            |
| R36 | 4257.0            | 74.71              | R74 | 3788.0            | 69.782             | R112 | 4009.0            | 71.193             |
| R37 | 4117.0            | 73.1963            | R75 | 4184.0            | 72.9903            |      |                   |                    |

**Fig. S1 d2.** (a) Histogram of thresholding the TEM image of the bottom surface of the AAO membrane with the chemical etching for 60 min. (b) The TEM image with the analyzed nanochannels after the thresholding. (c) Measurements of the sizes (diameter, unit: nm) of the analyzed nanochannels on the bottom surface of the AAO membrane.

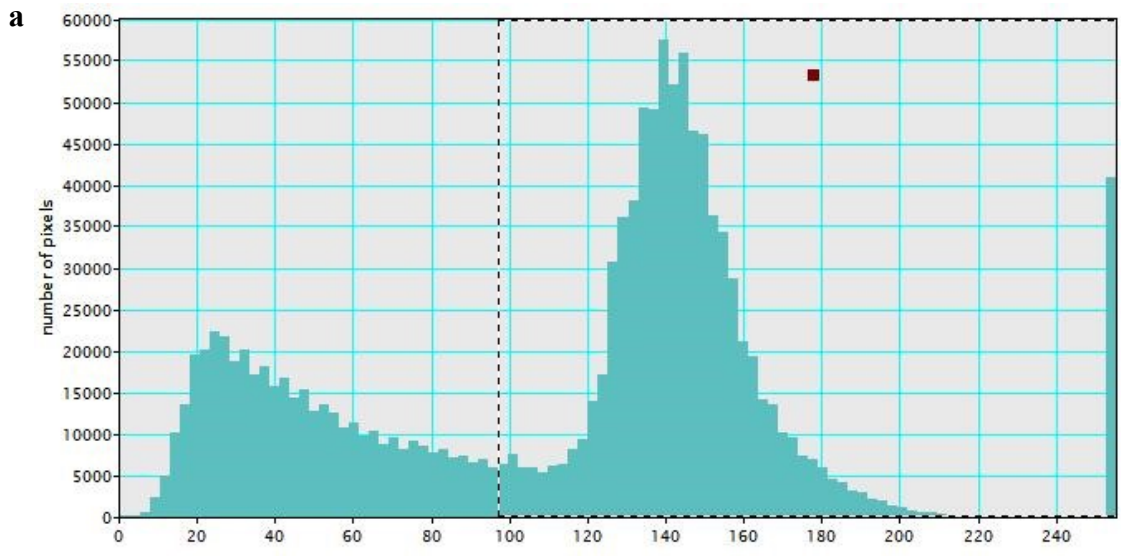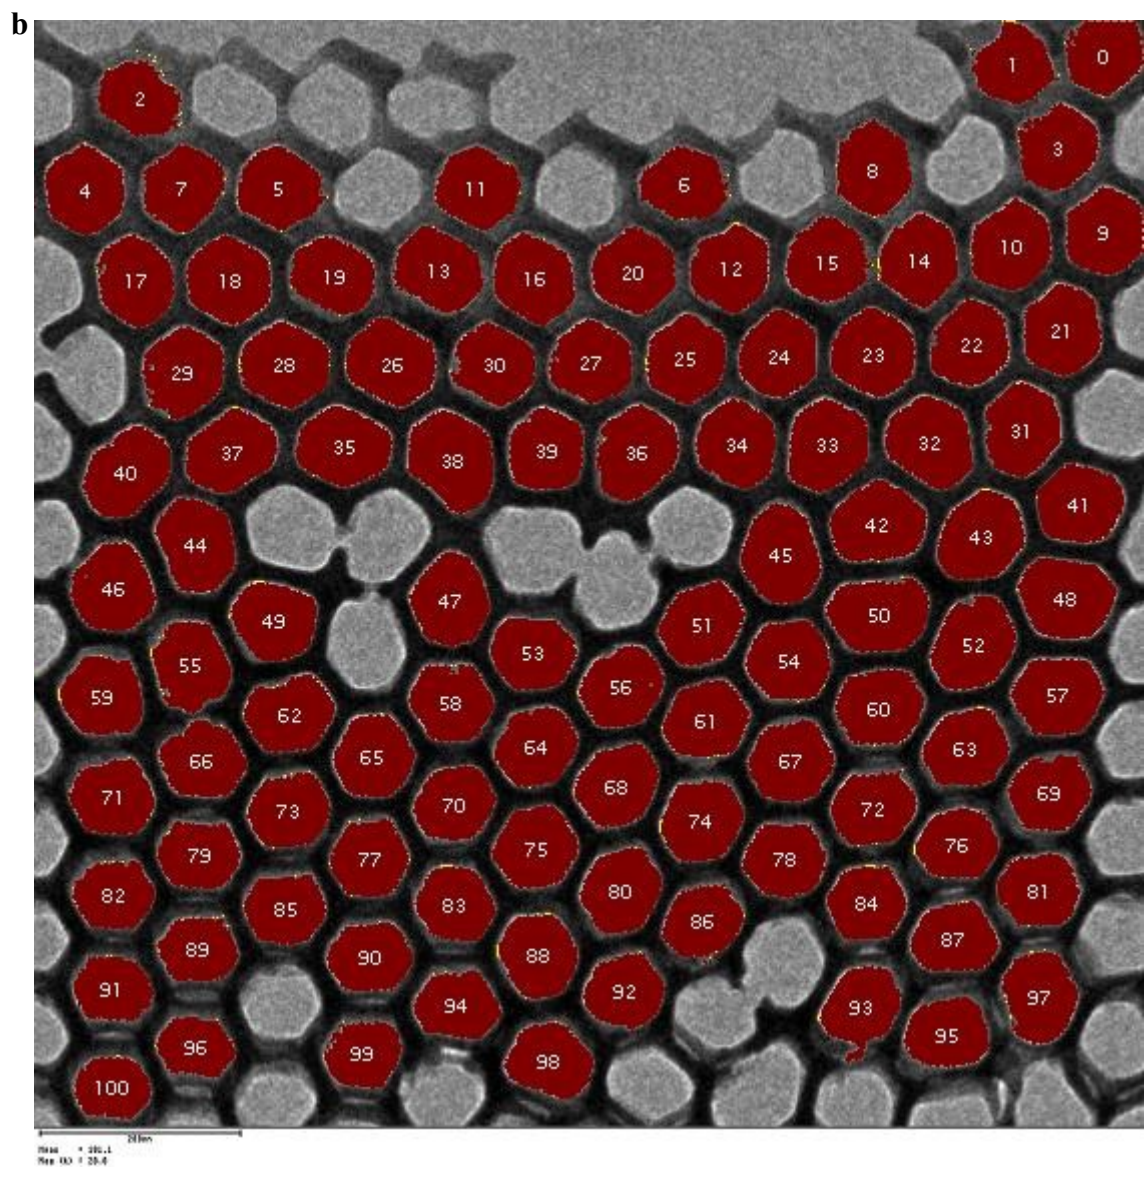

|     | <i>FilledArea</i> | <i>CircleDiameter</i> |     | <i>FilledArea</i> | <i>CircleDiameter</i> |      | <i>FilledArea</i> | <i>CircleDiameter</i> |
|-----|-------------------|-----------------------|-----|-------------------|-----------------------|------|-------------------|-----------------------|
| R0  | 4978.0            | 81.8822               | R33 | 6029.0            | 89.8498               | R68  | 5496.0            | 85.2236               |
| R1  | 5088.0            | 87.703                | R34 | 5615.0            | 85.6829               | R69  | 5110.0            | 83.1229               |
| R2  | 5094.0            | 87.7224               | R35 | 5973.0            | 89.0597               | R70  | 4999.0            | 81.2296               |
| R3  | 5479.0            | 86.04                 | R36 | 6148.0            | 90.7919               | R71  | 5237.0            | 83.8207               |
| R4  | 5698.0            | 86.4934               | R37 | 5864.0            | 88.6455               | R72  | 5204.0            | 84.51                 |
| R5  | 5610.0            | 88.0779               | R38 | 6781.0            | 96.1183               | R73  | 5072.0            | 82.1817               |
| R6  | 5079.0            | 85.1692               | R39 | 5244.0            | 83.1339               | R74  | 5527.0            | 85.3681               |
| R7  | 5436.0            | 86.3797               | R40 | 5984.0            | 89.9562               | R75  | 5536.0            | 85.2147               |
| R8  | 5718.0            | 88.7703               | R41 | 5559.0            | 85.4738               | R76  | 4753.0            | 79.2487               |
| R9  | 5643.0            | 86.6662               | R42 | 6224.0            | 91.1927               | R77  | 4989.0            | 81.891                |
| R10 | 5769.0            | 87.784                | R43 | 6238.0            | 90.7197               | R78  | 5088.0            | 81.8933               |
| R11 | 5472.0            | 87.3711               | R44 | 5962.0            | 89.8008               | R79  | 4762.0            | 80.7015               |
| R12 | 5511.0            | 85.8943               | R45 | 6261.0            | 91.9188               | R80  | 5491.0            | 85.4153               |
| R13 | 5823.0            | 89.9843               | R46 | 5890.0            | 88.2179               | R81  | 4984.0            | 81.6043               |
| R14 | 5727.0            | 88.1377               | R47 | 5690.0            | 86.9638               | R82  | 4633.0            | 78.9927               |
| R15 | 5519.0            | 86.4275               | R48 | 6452.0            | 92.7143               | R83  | 4844.0            | 79.7138               |
| R16 | 5886.0            | 88.5924               | R49 | 5537.0            | 85.8349               | R84  | 4888.0            | 80.1579               |
| R17 | 5620.0            | 85.8694               | R50 | 6308.0            | 93.6003               | R85  | 4795.0            | 80.2646               |
| R18 | 5980.0            | 88.3658               | R51 | 5496.0            | 85.4803               | R86  | 4742.0            | 80.9021               |
| R19 | 5249.0            | 84.8815               | R52 | 6213.0            | 91.2198               | R87  | 5080.0            | 82.9129               |
| R20 | 5650.0            | 87.1099               | R53 | 5171.0            | 82.6717               | R88  | 5392.0            | 83.9622               |
| R21 | 5772.0            | 87.7065               | R54 | 5592.0            | 85.8198               | R89  | 4366.0            | 77.2763               |
| R22 | 5406.0            | 84.6727               | R55 | 5646.0            | 87.4796               | R90  | 4912.0            | 81.2395               |
| R23 | 5887.0            | 87.4503               | R56 | 5431.0            | 84.621                | R91  | 4317.0            | 76.9457               |
| R24 | 5465.0            | 84.4805               | R57 | 5827.0            | 88.129                | R92  | 4827.0            | 80.1741               |
| R25 | 5615.0            | 85.9934               | R58 | 5332.0            | 83.8509               | R93  | 5227.0            | 88.3691               |
| R26 | 6130.0            | 90.1136               | R59 | 5548.0            | 86.5412               | R94  | 4823.0            | 81.3935               |
| R27 | 5383.0            | 84.2784               | R60 | 5600.0            | 86.1181               | R95  | 5016.0            | 83.1652               |
| R28 | 6055.0            | 89.0579               | R61 | 5398.0            | 84.9508               | R96  | 3925.0            | 74.3633               |
| R29 | 5860.0            | 87.8903               | R62 | 5473.0            | 86.1339               | R97  | 5535.0            | 86.66                 |
| R30 | 5323.0            | 84.8343               | R63 | 5433.0            | 84.7612               | R98  | 5159.0            | 83.5668               |
| R31 | 5723.0            | 87.6105               | R64 | 5234.0            | 83.3156               | R99  | 4357.0            | 77.0118               |
| R32 | 6292.0            | 91.6382               | R65 | 5447.0            | 84.3877               | R100 | 4034.0            | 73.5165               |
| R33 | 6029.0            | 89.8498               | R66 | 5231.0            | 83.5892               |      |                   |                       |

**Fig. S1 e1.** (a) Histogram of thresholding the TEM image of the top surface of the AAO membrane with the chemical etching for 95 min. (b) M image with the analyzed nanochannels after the thresholding. (c) Measurements of the sizes (diameter, unit: nm) of the analyzed nanochannels on the top surface of the AAO membrane.

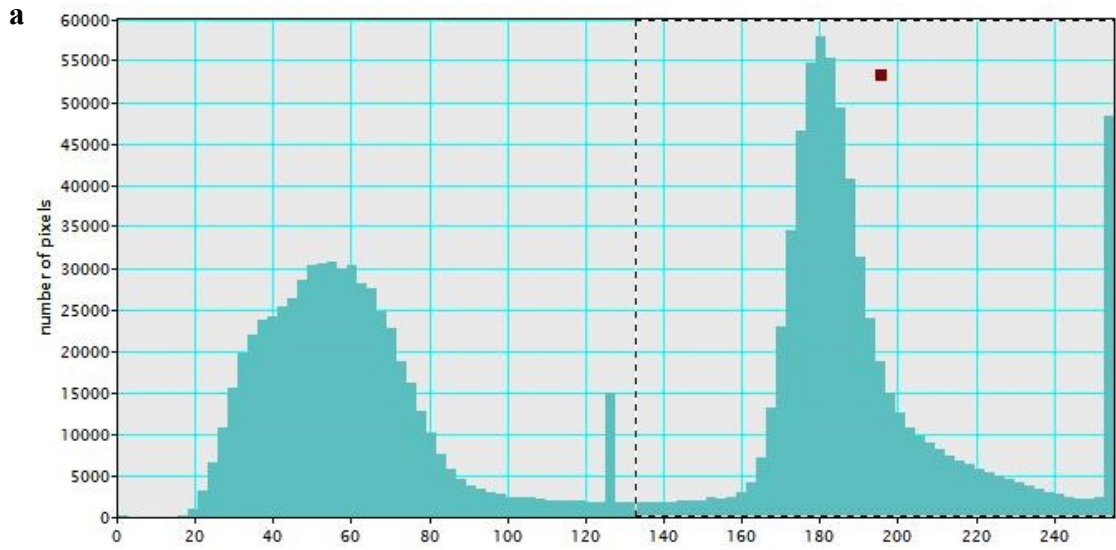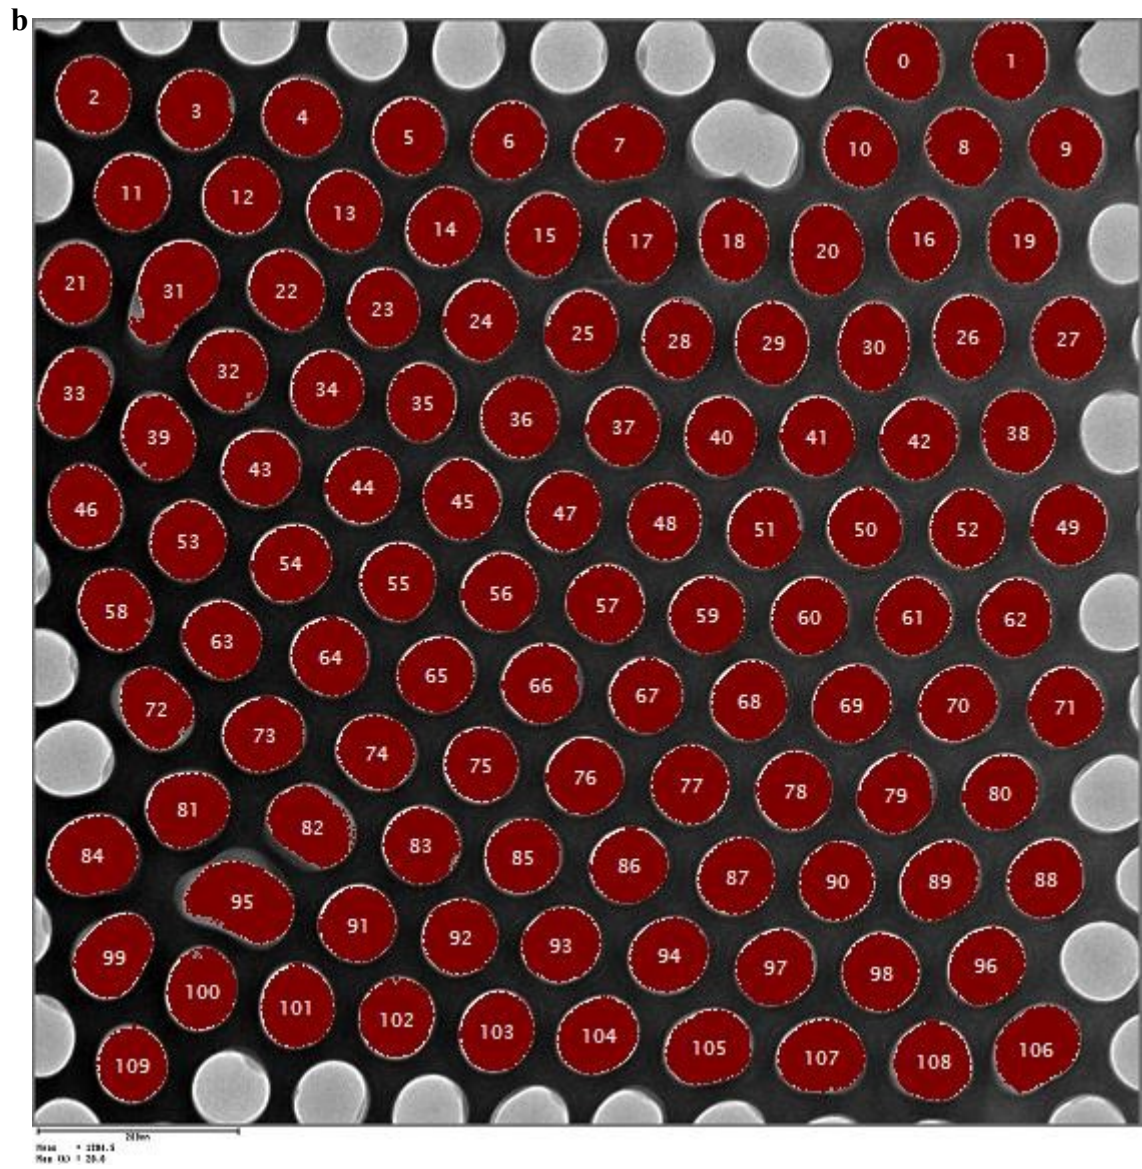

|            | <i>FilledArea</i> | <i>CircleDiameter</i> |            | <i>FilledArea</i> | <i>CircleDiameter</i> |             | <i>FilledArea</i> | <i>CircleDiameter</i> |
|------------|-------------------|-----------------------|------------|-------------------|-----------------------|-------------|-------------------|-----------------------|
| <i>R0</i>  | 4767.0            | 78.0321               | <i>R37</i> | 4643.0            | 76.8024               | <i>R74</i>  | 4638.0            | 76.84                 |
| <i>R1</i>  | 4831.0            | 78.4676               | <i>R38</i> | 4893.0            | 79.0234               | <i>R75</i>  | 4465.0            | 75.1655               |
| <i>R2</i>  | 4632.0            | 76.5456               | <i>R39</i> | 4856.0            | 79.2773               | <i>R76</i>  | 4806.0            | 77.9949               |
| <i>R3</i>  | 4755.0            | 77.9833               | <i>R40</i> | 4602.0            | 76.4081               | <i>R77</i>  | 4887.0            | 78.598                |
| <i>R4</i>  | 4854.0            | 78.4433               | <i>R41</i> | 4766.0            | 77.6987               | <i>R78</i>  | 4778.0            | 77.76                 |
| <i>R5</i>  | 4497.0            | 75.5487               | <i>R42</i> | 4999.0            | 79.6338               | <i>R79</i>  | 4792.0            | 78.2543               |
| <i>R6</i>  | 4647.0            | 76.8222               | <i>R43</i> | 4787.0            | 77.901                | <i>R80</i>  | 4530.0            | 75.8815               |
| <i>R7</i>  | 5587.0            | 85.4296               | <i>R44</i> | 4552.0            | 75.8495               | <i>R81</i>  | 5017.0            | 80.0634               |
| <i>R8</i>  | 4652.0            | 76.8457               | <i>R45</i> | 4939.0            | 79.1793               | <i>R82</i>  | 5220.0            | 83.2496               |
| <i>R9</i>  | 4770.0            | 78.0438               | <i>R46</i> | 4823.0            | 78.4311               | <i>R83</i>  | 4746.0            | 77.4823               |
| <i>R10</i> | 4669.0            | 77.4431               | <i>R47</i> | 4755.0            | 77.7094               | <i>R84</i>  | 5781.0            | 86.0185               |
| <i>R11</i> | 4652.0            | 76.6957               | <i>R48</i> | 4592.0            | 76.2325               | <i>R85</i>  | 4542.0            | 75.9184               |
| <i>R12</i> | 4786.0            | 77.8252               | <i>R49</i> | 4950.0            | 79.2432               | <i>R86</i>  | 4696.0            | 77.1518               |
| <i>R13</i> | 4881.0            | 78.7413               | <i>R50</i> | 4681.0            | 77.0729               | <i>R87</i>  | 4754.0            | 77.594                |
| <i>R14</i> | 4718.0            | 77.377                | <i>R51</i> | 4632.0            | 76.8698               | <i>R88</i>  | 4821.0            | 78.4345               |
| <i>R15</i> | 4964.0            | 79.6359               | <i>R52</i> | 4649.0            | 76.7772               | <i>R89</i>  | 4896.0            | 79.5678               |
| <i>R16</i> | 4748.0            | 77.926                | <i>R53</i> | 4789.0            | 77.8662               | <i>R90</i>  | 4760.0            | 77.64                 |
| <i>R17</i> | 4917.0            | 79.2265               | <i>R54</i> | 4968.0            | 79.4095               | <i>R91</i>  | 4712.0            | 77.174                |
| <i>R18</i> | 4626.0            | 77.0643               | <i>R55</i> | 4707.0            | 77.2531               | <i>R92</i>  | 4541.0            | 75.8017               |
| <i>R19</i> | 4918.0            | 79.4826               | <i>R56</i> | 4792.0            | 77.8335               | <i>R93</i>  | 4749.0            | 77.5874               |
| <i>R20</i> | 5364.0            | 83.3174               | <i>R57</i> | 4857.0            | 78.3956               | <i>R94</i>  | 4768.0            | 77.8102               |
| <i>R21</i> | 4761.0            | 77.8541               | <i>R58</i> | 4776.0            | 78.0999               | <i>R95</i>  | 6569.0            | 96.2231               |
| <i>R22</i> | 4766.0            | 77.9357               | <i>R59</i> | 4657.0            | 76.7708               | <i>R96</i>  | 4757.0            | 77.8984               |
| <i>R23</i> | 4542.0            | 75.8999               | <i>R60</i> | 4761.0            | 77.6945               | <i>R97</i>  | 4784.0            | 77.9654               |
| <i>R24</i> | 4757.0            | 77.6915               | <i>R61</i> | 4669.0            | 77.0073               | <i>R98</i>  | 4836.0            | 78.1915               |
| <i>R25</i> | 4729.0            | 77.657                | <i>R62</i> | 4618.0            | 76.557                | <i>R99</i>  | 5099.0            | 82.0634               |
| <i>R26</i> | 4819.0            | 78.5774               | <i>R63</i> | 4843.0            | 78.4488               | <i>R100</i> | 4633.0            | 77.0426               |
| <i>R27</i> | 4913.0            | 79.164                | <i>R64</i> | 4868.0            | 78.5388               | <i>R101</i> | 4974.0            | 79.5839               |
| <i>R28</i> | 4531.0            | 76.152                | <i>R65</i> | 4670.0            | 76.9361               | <i>R102</i> | 4820.0            | 78.2183               |
| <i>R29</i> | 4896.0            | 78.9864               | <i>R66</i> | 4960.0            | 79.6207               | <i>R103</i> | 4820.0            | 78.2313               |
| <i>R30</i> | 5106.0            | 81.1171               | <i>R67</i> | 4423.0            | 74.8293               | <i>R104</i> | 5005.0            | 79.8898               |
| <i>R31</i> | 6265.0            | 95.8339               | <i>R68</i> | 4904.0            | 78.8634               | <i>R105</i> | 5203.0            | 82.217                |
| <i>R32</i> | 5018.0            | 79.9857               | <i>R69</i> | 4865.0            | 78.5977               | <i>R106</i> | 5594.0            | 86.0005               |
| <i>R33</i> | 4984.0            | 80.9093               | <i>R70</i> | 4740.0            | 77.7319               | <i>R107</i> | 5214.0            | 81.8508               |
| <i>R34</i> | 4497.0            | 75.4533               | <i>R71</i> | 4744.0            | 77.6203               | <i>R108</i> | 4948.0            | 79.4725               |
| <i>R35</i> | 4294.0            | 73.9632               | <i>R72</i> | 4664.0            | 78.0062               | <i>R109</i> | 4263.0            | 73.6111               |
| <i>R36</i> | 5020.0            | 79.8786               | <i>R73</i> | 4890.0            | 78.8357               |             |                   |                       |

**Fig. S1 e2.** (a) Histogram of thresholding the TEM image of the bottom surface of the AAO membrane with the chemical etching for 95 min. (b) The TEM image with the analyzed nanochannels after the thresholding. (c) Measurements of the sizes (diameter, unit: nm) of the analyzed nanochannels on the bottom surface of the AAO membrane.

## 2. UV-vis absorption spectra of the AAO membranes with different thicknesses

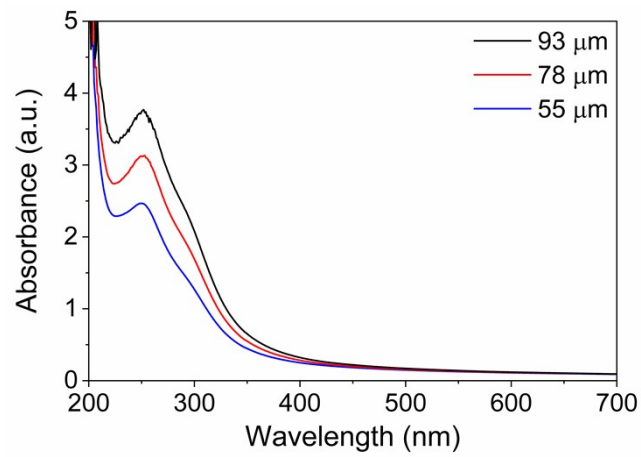

**Fig. S2** UV-vis absorption spectra of the AAO membranes with different thicknesses (55 μm, 78 μm and 93 μm).

### 3. Measurement of the thicknesses $d_i$ of the AAO membranes

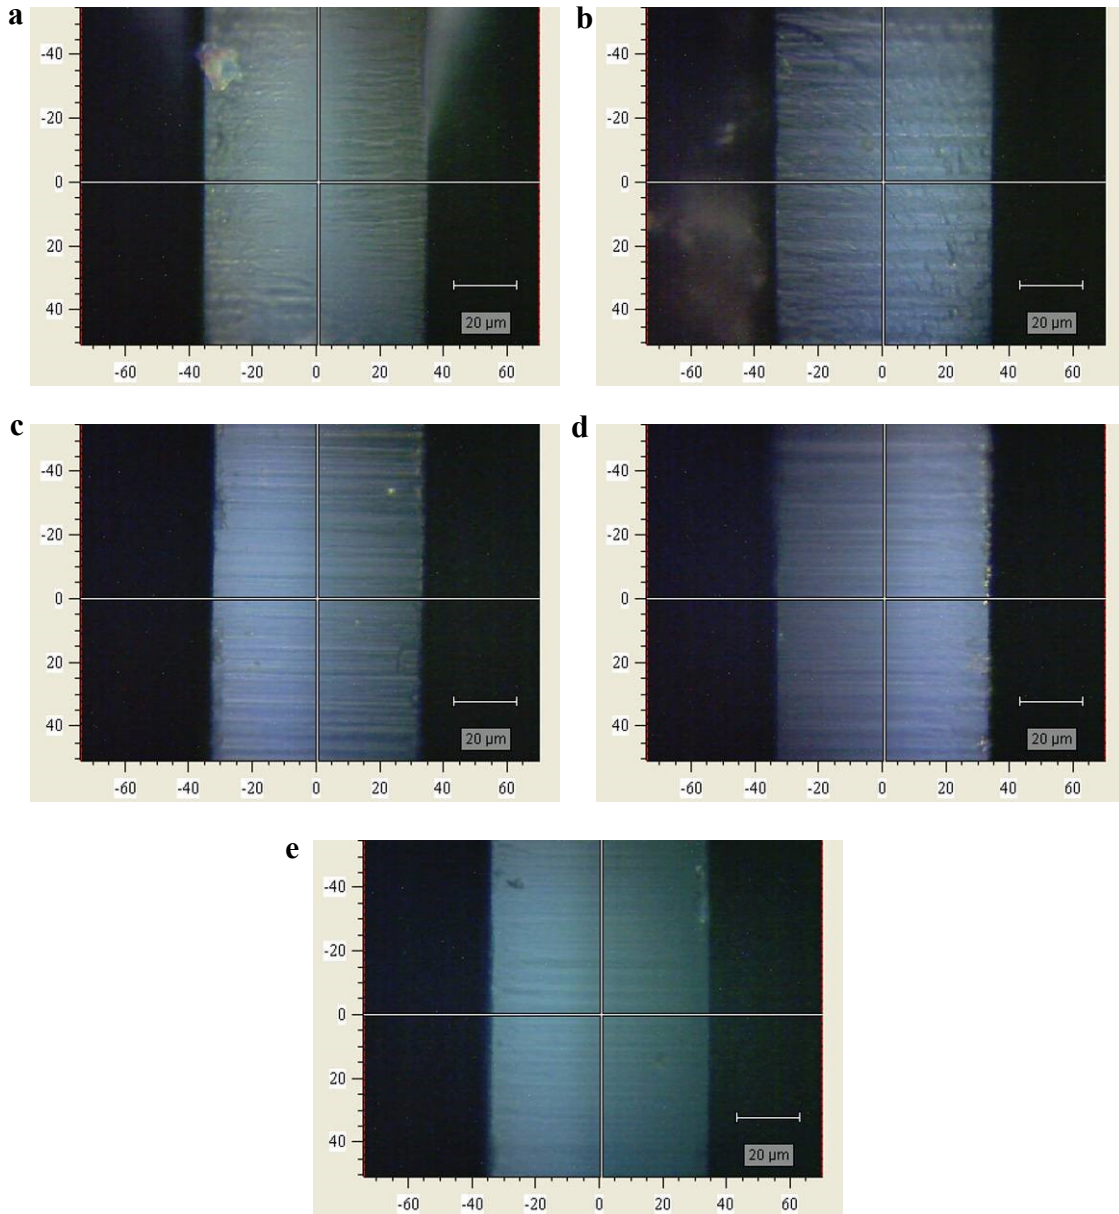

**Fig. S3** Cross-section images of the whole AAO membranes after the chemical etching for 0 min (a), 10 min (b), 35 min (c), 60 min (d) and 95 min (e) by an optical microscope (Leica, DM2500 M, 50× objective (N.A. = 0.75), MS 20 encoded stage) with control of a Renishaw WiRE 3.2 software. On the basis of the measurements by the DM software, the thicknesses  $d_1$ ,  $d_2$ ,  $d_3$ ,  $d_4$  and  $d_5$  are 70.57, 68.30, 66.42, 67.17 and 68.30 μm, respectively, which correspond to the AAO membranes after the chemical etching for 0, 10, 35, 60 and 95 min, respectively.

#### 4. Appendix: Measurement of the molar extinction coefficient of aluminum oxalate

It is mentioned that the molar absorptivity of aluminum oxalate cannot be found in those references.<sup>S1, S2</sup> In this case, the  $\epsilon$  value can approximately be measured according to the Beer-Lambert law,<sup>S3, S4</sup> which is expressed as  $A' = \epsilon cl$ , where  $A'$ ,  $c$  and  $l$  are the absorbance of aluminum oxalate, concentration of solute ( $\text{mol L}^{-1}$ ) and path length (cm), respectively. For a typically wide concentration range of aluminum oxalate from 0.05 to 2  $\text{mmol L}^{-1}$ , it is noting that the concentration over the range will result into saturated or very weak absorption bands, the value of the molar extinction coefficient is about 238.5 at 260 nm, where a polar solvent shifts absorption to the longer wavelength (e.g., 260 nm in contrast to 254 nm) owing to the excited states forming stronger hydrogen bonds than the corresponding ground states. Similarly, the  $\epsilon$  value is 229 at 253 nm for oxalic acid calcium salt ( $\text{C}_2\text{O}_4\text{Ca}\cdot\text{H}_2\text{O}$ ) obtained by the reference S3. Notes that the molar extinction coefficient below 1000 are low-intensity absorptions with a forbidden transition,<sup>S4</sup> therefore, the absorption at 254 nm is originated from the  $n \rightarrow \pi^*$  (nonbonding atomic  $n$  orbital to antibonding  $\pi$  orbital) transition of the carbonyl group of aluminum oxalate.



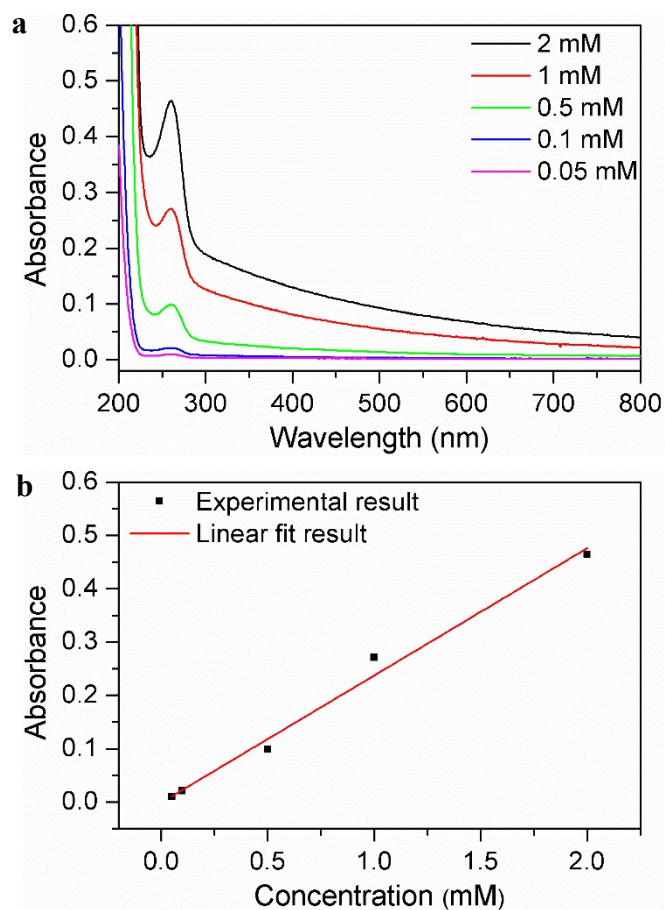

**Fig. S4** (a) UV-Vis absorption spectra of aluminum oxalate solution with different concentration from 0.05 mM to 2mM. (b) Linear fit result of the absorbance with the concentration of the aluminum oxalate solution.

## References

- S1. J. G. Grasselli, W. M. Ritchey, *CRC Atlas of Spectral Data and Physical Constants for Organic Compounds*. 2nd ed. Vol. 3, CRC Press, Cleveland, **1975**.
- S2. *Sadtler Ultraviolet (non-polar) Spectra*. Vol. 2, 501UN-1000UN, Sadtler research laboratories: Philadelphia, **1975**.
- S3. J. Mohan, *Organic Spectroscopy: Principles and Applications*, Narosa Publishing House: New Delhi, **2001**.
- S4. D. L. Pavia, G. M. Lampman, G. S. Kriz, *Introduction to Spectroscopy*, 3rd ed. Thomson Learning, **2001**.
